# Supplementary material for: Knockdown of Death-Associated Protein Expression Induces Global Transcriptome Changes in Proliferating and Differentiating Muscle Satellite Cells
Source: Front Physiol. 2020 Aug 14;11:1036. doi: 10.3389/fphys.2020.01036 (PMC7457014; doi:10.3389/fphys.2020.01036)
Supplement: Supplementary file 2 [file Table_2.XLSX]

## Sheet: Sheet1
Table S2: Differentially Expressed Genes in Proliferating Satellite Cells Following DAP Knockdown
Gene	Fold Change	Adjusted p value	Probe name	Accession	Description
EIF3E	29.2256	0.00993702	Q2_Reed_18d_tembryo_07_I18_281	XM_010709216.2	PREDICTED: Meleagris gallopavo eukaryotic translation initiation factor 3 subunit E
16S RNA	21.7422	0.0149094	Contig[1982]	JF275060.1	Meleagris gallopavo strain Nicholas mitochondrion, complete genome
GTF2E2	19.6194	0.0246278	Q1_Reed_1DPH_cDNA_07_I17_265	XM_010709611.3	PREDICTED: Meleagris gallopavo general transcription factor IIE subunit 2
FTH1	17.189	0.00798334	Q1_Reed_1DPH_cDNA_10_C13_195	XM_019616075.2	PREDICTED: Meleagris gallopavo ferritin heavy chain 1
LOC100541517	16.0042	0.00993702	Q1_Reed_um_mg_cDNA1_04_44D06	XM_031554584.1	PREDICTED: Meleagris gallopavo protein FRA10AC1
DDX52	11.8451	0.0337556	Q3_Reed_um_Mg_cDNA_01_64H08	XM_010722000.3	PREDICTED: Meleagris gallopavo DExD-box helicase 52
DNAJA1	11.781	0.0147227	Contig[0505]	XM_010726176.3	PREDICTED: Meleagris gallopavo DnaJ heat shock protein family (Hsp40) member A1
MCAM	11.3659	0.0110507	Contig[0698]	XM_019623042.2	PREDICTED: Meleagris gallopavo melanoma cell adhesion molecule
PPP1R2	11.3299	0.00993702	Q2_Reed_16wkTurkeyMuscle_02_C16	XM_010716375.3	PREDICTED: Meleagris gallopavo protein phosphatase 1 regulatory inhibitor subunit 2
HELLS	11.1993	0.0252092	Q1_Reed_18d_tembryo_02_O13_207	XM_010714411.3	PREDICTED: Meleagris gallopavo helicase, lymphoid specific
ETFDH	11.1019	0.00326391	Q3_Reed_UM_Mg_cDNA1_05_03C01	XM_010709442.2	PREDICTED: Meleagris gallopavo electron transfer flavoprotein dehydrogenase
LOC112533599	10.3616	0.00993702	Q2_Reed_18d_tembryo_06_I18_281	XR_003078040.1	PREDICTED: Gallus gallus 28S ribosomal RNA (LOC112533599), rRNA
FTH1	10.108	0.00326391	Contig[ferritin__heavy_polypept-C	NM_205086	Gallus gallus ferritin, heavy polypeptide 1 (FTH1)
NOP53	9.93901	0.0207548	Q4_Reed_1DPH_cDNA_02_D24_372	XM_031608500.1	PREDICTED: Phasianus colchicus NOP53 ribosome biogenesis factor (NOP53), mRNA
HSP90AA1	9.77187	0.0190229	Q2_Reed_UM_Mg_cDNA1_06_11C02	XM_010711927.3	PREDICTED: Meleagris gallopavo heat shock protein 90 alpha family class A member 1
CDCP1	9.73534	0.0300615	Q3_Reed_UM_Mg_cDNA1_07_44D06	XM_010712960.3	PREDICTED: Meleagris gallopavo CUB domain containing protein 1
EIF3J	9.47094	0.0371085	Q1_Reed_16wkturkeyMuscle_04_K07	XM_019619293.1	PREDICTED: Meleagris gallopavo eukaryotic translation initiation factor 3 subunit J
MITF	9.44398	0.00894541	Q2_Reed_um_mg_cDNA1_02_30F04	XM_031555617.1	PREDICTED: Meleagris gallopavo melanocyte inducing transcription factor
HSP25	9.10957	0.0252092	HSP25	XM_010724676.3	PREDICTED: Meleagris gallopavo heat shock protein 30C-like (LOC100547911), mRNA
SDE2	8.99811	0.00993702	Q4_Reed_16wkturkeymuscle_09_D18	XM_010706798.1	PREDICTED: Meleagris gallopavo SDE2 telomere maintenance homolog
EEF1G	8.27225	0.0140821	Contig[0503]	NM_001198750.1	Gallus gallus eukaryotic translation elongation factor 1 gamma (EEF1G), mRNA
PRKAA1	7.83731	0.00798334	Q3_Reed_um_Mg_cDNA1_09_20D03	NM_001303217.1	Meleagris gallopavo protein kinase, AMP-activated, alpha 1 catalytic subunit
TBC1D9B	7.41998	0.0190229	Q2_Reed_16wkturkeymuscle_05_M16	XM_010719131.2	PREDICTED: Meleagris gallopavo TBC1 domain family member 9B
LOC104909666	7.09893	0.00894541	Q1_Reed_UM_Mg_cDNA1_07_12D02	XM_010706942.1	PREDICTED: Meleagris gallopavo adenylosuccinate synthetase isozyme 2-like
METTL6	7.07861	0.0470736	Q3_Reed_1DPH_cDNA_01_J19_298	XM_031553955.1	PREDICTED: Meleagris gallopavo methyltransferase like 6
ATP1A1	7.05121	0.00993702	Q1_Reed_1DPH_02_02_38F05	XM_010719100.3	PREDICTED: Meleagris gallopavo ATPase Na+/K+ transporting subunit alpha 1
ACO2	7.01897	0.0175196	KMR3635_D06_008	XM_010710428.3	PREDICTED: Meleagris gallopavo aconitase 2
NFATC2	6.931	0.0314517	NFAT-NEG	XM_417509.5	PREDICTED: Gallus gallus similar to nuclear factor of activated T-cells, cytoplasmic, calcineurin-dependent 2 (LOC419346)
28S RNA	6.59824	0.00900408	Q4_Reed_16wkTurkeyMuscle_02_F10	XR_003078040.1	PREDICTED: Gallus gallus 28S ribosomal RNA (LOC112533599), rRNA
TAX1BP1	6.59522	0.022506	Q1_Reed_18d_tembryo_03_C21_323	XM_019616511.2	PREDICTED: Meleagris gallopavo Tax1 binding protein 1
EIF5	6.49511	0.0175233	Contig[1067]	XM_010711943.3	PREDICTED: Meleagris gallopavo eukaryotic translation initiation factor 5
ADAM17	6.43228	0.0144833	Q1_Reed_um_mg_cDNA1_04_90B12	XM_010707921.3	PREDICTED: Meleagris gallopavo ADAM metallopeptidase domain 17
NRAP	6.29766	0.0110507	Contig[1825]	XM_031554591.1	PREDICTED: Meleagris gallopavo nebulin related anchoring protein
USP14	5.98159	0.0114589	Q4_Reed_16wkturkeymuscle_05_D24	XM_010708813.1	PREDICTED: Meleagris gallopavo ubiquitin specific peptidase 14
IP6K2	5.85673	0.00993702	Q2_Reed_um_Mg_cDNA1_09_60D08	XM_003210090.4	PREDICTED: Meleagris gallopavo inositol hexakisphosphate kinase 2
ACBD3	5.83889	0.027397	Q3_Reed_UM_Mg_cDNA1_10_45E06	XM_010706796.2	PREDICTED: Meleagris gallopavo acyl-CoA binding domain containing 3
LOC104916160	5.83692	0.0246278	Q1_Reed_1DPH_cDNA_11_K09_139	XM_010727140.3	PREDICTED: Meleagris gallopavo natterin-3-like
SART3	5.74309	0.00815536	Contig[2536]	XM_010720244.3	PREDICTED: Meleagris gallopavo spliceosome associated factor 3, U4/U6 recycling protein
RPS2	5.42977	0.0147227	Contig[0444]	XM_010719813.1	PREDICTED: Meleagris gallopavo ribosomal protein S2
RPS15	5.40824	0.0310948	Q4_Reed_1DPH_02_03_J16_250	XM_010725012.3	PREDICTED: Meleagris gallopavo ribosomal protein S15
novel transcript	5.37956	0.0147227	Q4_Reed_UM_Mg_cDNA1_06_77E10
LOC100542537	5.34905	0.0324803	Q3_Reed_18d_tembryo_06_F21_326	XM_019617183.2	PREDICTED: Meleagris gallopavo coiled-coil domain-containing protein 173-like
PPIG	5.34353	0.0433398	KMR3635_D12_008	XM_019617182.2	PREDICTED: Meleagris gallopavo peptidylprolyl isomerase G
LOC100548808	5.28566	0.00894541	Q2_Reed_um_mg_cDNA1_02_32H04	XM_010715351.1	PREDICTED: Meleagris gallopavo ubiquitin carboxyl-terminal hydrolase 12-like
PCNX1	5.27392	0.0190229	Q1_Reed_1DPH_cDNA_09_C19_291	XM_019616108.1	PREDICTED: Meleagris gallopavo pecanex 1
TPM4	5.19534	0.0181476	Contig[cardiac_tropomyosin-like	X54281.1	C.coturnix japonica gene for cardiac and cytoskeletal tropomyosin, exons 9-11
YAE1	5.14218	0.0279217	Q1_Reed_1DPH_cDNA_08_G05_071	XM_003207324.4	PREDICTED: Meleagris gallopavo YAE1 maturation factor of ABCE1
PDCD7	5.13944	0.0310335	Q2_Reed_1DPH_cDNA_12_G08_119	XM_003209558.2	PREDICTED: Meleagris gallopavo programmed cell death 7
FTH1	5.12472	0.0287726	Contig[ferritin__heavy_polypept	NM_205086	Gallus gallus ferritin, heavy polypeptide 1 (FTH1)
LOC109369698	5.09476	0.028571	Q1_Reed_UM_Mg_cDNA1_07_53E07	XR_004161198.1	PREDICTED: Meleagris gallopavo uncharacterized LOC109369698
LOC104913510	5.05524	0.0144833	Q4_Reed_16wkTurkeyMuscle_03_D04	XM_019620580.2	PREDICTED: Meleagris gallopavo uncharacterized LOC104913510
RTKN	5.00734	0.0168906	Q2_Reed_UM_Mg_cDNA1_06_21E03	XM_025150460.1	PREDICTED: Gallus gallus rhotekin (RTKN), transcript variant X11, mRNA
GSTA2	4.97727	0.00894541	Q1_Reed_16wkturkeyMuscle_04_K17	XM_019613208.2	PREDICTED: Meleagris gallopavo glutathione S-transferase
P3H4	4.9758	0.0380947	Q1_Reed_1DPH_cDNA_07_K03_043	XM_019623358.1	PREDICTED: Meleagris gallopavo prolyl 3-hydroxylase family member 4 (inactive)
EIF3A	4.96942	0.0190229	Q3_Reed_16wkturkeymuscle_08_N19	XM_010714909.3	PREDICTED: Meleagris gallopavo eukaryotic translation initiation factor 3 subunit A
WDR45B	4.96808	0.0252098	Q2_Reed_um_mg_cDNA1_02_73A10	XM_010721247.3	PREDICTED: Meleagris gallopavo WD repeat domain 45B
EIF3L	4.92167	0.0168906	Q4_Reed_18d_tembryo_03_N16_254	XM_031554446.1	PREDICTED: Meleagris gallopavo eukaryotic translation initiation factor 3 subunit L
LOC112533602	4.90908	0.0147227	Contig[0681]	XR_003078043.1	PREDICTED: Gallus gallus 18S ribosomal RNA (LOC112533602), rRNA
RPL22L1	4.83084	0.0144833	Q2_Reed_um_mg_cDNA1_02_84D11	XM_010717084.2	PREDICTED: Meleagris gallopavo ribosomal protein L22 like 1
RPL6	4.81082	0.0168906	Contig[0743]	XM_010720192.3	PREDICTED: Meleagris gallopavo ribosomal protein L6
ND5	4.78813	0.00993702	Contig[0630]	ADX43874.1	NADH dehydrogenase subunit 5
LOC112530942	4.70124	0.0452809	Q1_Reed_1DPH_cDNA_01_A19_289	XM_025145628.1	PREDICTED: Gallus gallus NADH-ubiquinone oxidoreductase chain 1-like (LOC112530942), mRNA
RPS15	4.68762	0.0380947	Q4_Reed_1DPH_02_03_J16_250-C	XM_010725012.3	PREDICTED: Meleagris gallopavo ribosomal protein S15
PPP1R3B	4.62487	0.0244016	Q1_Reed_UM_Mg_cDNA1_05_78F10	XM_003205600.3	PREDICTED: Meleagris gallopavo protein phosphatase 1 regulatory subunit 3B
LOC100548537	4.53811	0.0120282	Q1_Reed_1DPH_cDNA_11_E07_101	XM_003204726.4	PREDICTED: Meleagris gallopavo tRNA selenocysteine 1-associated protein 1
LSP1	4.48245	0.00993702	Q2_Reed_um_mg_cDNA1_03_85E11	XM_010711003.2	PREDICTED: Meleagris gallopavo lymphocyte specific protein 1
FERMT2	4.4127	0.0110507	Q3_Reed_um_Mg_cDNA1_09_27C04	XM_019616036.2	PREDICTED: Meleagris gallopavo fermitin family member 2
NAP1L4	4.4002	0.0175196	Contig[0770]	XM_010711046.1	PREDICTED: Meleagris gallopavo nucleosome assembly protein 1 like 4
HACD1	4.37751	0.0147227	Contig[1086]	XM_010712619.3	PREDICTED: Meleagris gallopavo 3-hydroxyacyl-CoA dehydratase 1
LOC104915569	4.22851	0.0168906	Q4_Reed_18d_tembryo_03_J22_346	XM_010726490.3	PREDICTED: Meleagris gallopavo integrin alpha-1-like
BASP1	4.19655	0.0375758	Q2_Reed_um_Mg_cDNA1_09_15G02	XM_003204817.4	PREDICTED: Meleagris gallopavo brain abundant membrane attached signal protein 1
HSPB9	4.14583	0.0386888	Q3_Reed_16wkturkeymuscle_08_H01	XM_010724677.2	PREDICTED: Meleagris gallopavo heat shock protein family B (small) member 9
RDX	4.14136	0.0251237	Q4_Reed_16wkTurkeyMuscle_03_L04	XM_003203440.4	PREDICTED: Meleagris gallopavo radixin
SPTBN1	4.11606	0.0144833	Q1_Reed_UM_Mg_cDNA1_05_61E08	XM_010706345.3	PREDICTED: Meleagris gallopavo spectrin beta, non-erythrocytic 1
LOC100542959	4.10241	0.031577	Q2_Reed_um_Mg_cDNA_01_26B04	XM_003210451.4	PREDICTED: Meleagris gallopavo RUN and FYVE domain-containing protein 1
CCDC50	4.09996	0.0238813	Q4_Reed_UM_Mg_cDNA1_10_58B08	XM_019618876.1	PREDICTED: Meleagris gallopavo coiled-coil domain containing 50
MESD	4.06203	0.0144833	Q1_Reed_1DPH_cDNA_06_G13_199	XM_031555324.1	PREDICTED: Meleagris gallopavo mesoderm development LRP chaperone
AGRN	4.0606	0.0426317	Q4_Reed_18d_tembryo_02_L02_028	XM_010722770.3	PREDICTED: Meleagris gallopavo agrin
TPR	4.05475	0.0104448	Q2_Reed_1DPH_cDNA_04_G22_343	XM_010715532.3	PREDICTED: Meleagris gallopavo translocated promoter region, nuclear basket protein
RTN4	4.02049	0.0114857	Q2_Reed_UM_Mg_cDNA1_07_21E03	LOC100542210	RTN4 reticulon 4 [ Meleagris gallopavo (turkey) ]
SFSWAP	3.98195	0.0162385	Q1_Reed_16wkturkeyMuscle_04_G03	XM_019620992.2	PREDICTED: Meleagris gallopavo splicing factor SWAP
undescribed transcript	3.97582	0.0246278	Q1_Reed_1DPH_cDNA_09_O07_111		undescribed transcript, chromosome Un
RAB30	3.96848	0.0144833	Q3_Reed_18d_tembryo_02_B03_034	XM_003203537.4	PREDICTED: Meleagris gallopavo RAB30, member RAS oncogene family
HDLBP	3.94436	0.017383	Q2_Reed_UM_Mg_cDNA1_07_77E10	XM_010716510.2	PREDICTED: Meleagris gallopavo high density lipoprotein binding protein
PG-M	3.87568	0.0256262	Proteoglycan	X60226.1	G.gallus PG-M mRNA for proteoglycan
CCDC80	3.87214	0.0252092	Q4_Reed_16wkTurkeyMuscle_04_H14	XM_003202749.4	PREDICTED: Meleagris gallopavo coiled-coil domain containing 80
RAPGEF1	3.8696	0.017383	Q3_Reed_18d_tembryo_04_L19_300	XM_031556208.1	PREDICTED: Meleagris gallopavo Rap guanine nucleotide exchange factor 1
LOC100545668	3.86871	0.0253941	Q1_Reed_UM_Mg_cDNA1_10_11C02	XM_003202470.4	PREDICTED: Meleagris gallopavo aldo-keto reductase family 1 member B1-like
MARCKS	3.8599	0.0246261	Q2_Reed_18d_tembryo_06_E20_309	XM_030003259.1	PREDICTED: Aquila chrysaetos chrysaetos myristoylated alanine rich protein kinase C substrate (MARCKS), transcript variant X1, mRNA
NCAPH2	3.83051	0.02206	Q4_Reed_18d_tembryo_06_P22_352	XM_019611027.1	PREDICTED: Meleagris gallopavo non-SMC condensin II complex subunit H2
LOC109365355	3.82964	0.0149094	Q2_Reed_18d_tembryo_03_A24_369	XR_002110905.2	PREDICTED: Meleagris gallopavo uncharacterized LOC109365355
HSP90B1	3.75389	0.0314861	Contig[0414]-distance-m	XM_003202376.4	PREDICTED: Meleagris gallopavo heat shock protein 90 beta family member 1
C3H8orf37	3.69402	0.0175196	Q2_Reed_um_mg_cDNA1_02_80H10	XM_019614158.2	PREDICTED: Meleagris gallopavo chromosome 3 C8orf37 homolog
BSDC1	3.6832	0.0216373	Q1_Reed_UM_Mg_cDNA1_06_57A08	XM_003212603.3	PREDICTED: Meleagris gallopavo BSD domain containing 1
RPLP1	3.65788	0.0311241	Q2_Reed_16wkturkeymuscle_09_O02	XM_003205306.4	PREDICTED: Meleagris gallopavo ribosomal protein lateral stalk subunit P1
TMBIM6	3.55913	0.0189038	Contig[2522]	XM_025145468.1	PREDICTED: Gallus gallus transmembrane BAX inhibitor motif containing 6 (TMBIM6), transcript variant X2, mRNA
FN1	3.54564	0.0162401	Q3_Reed_UM_Mg_cDNA1_05_80H10	XM_019617349.1	PREDICTED: Meleagris gallopavo fibronectin 1
NAV2	3.53499	0.0191658	Q3_Reed_um_mg_cDNA1_03_56H07	XM_025151416.1	PREDICTED: Gallus gallus neuron navigator 2 (NAV2), transcript variant X14, mRNA
NPTN	3.51933	0.0175196	Contig[0431]	XM_010717167.3	PREDICTED: Meleagris gallopavo neuroplastin
GOLIM4	3.50987	0.0256262	KMR3635_B12_004	XM_010716959.3	PREDICTED: Meleagris gallopavo golgi integral membrane protein 4
SERP1	3.50499	0.0110507	Q1_Reed_18d_tembryo_02_C17_259	XM_031603746.1	PREDICTED: Phasianus colchicus stress associated endoplasmic reticulum protein 1 (SERP1), mRNA
TCF12	3.4573	0.0205005	Contig[0782]	XM_019619399.2	PREDICTED: Meleagris gallopavo transcription factor 12
MCRIP2	3.44414	0.031008	Contig[2859]	XM_003210809.3	PREDICTED: Meleagris gallopavo MAPK regulated corepressor interacting protein 2
LOC100546546	3.41709	0.0329534	Q1_Reed_1DPH_cDNA_01_E21_325	XM_010707343.3	PREDICTED: Meleagris gallopavo ethylmalonyl-CoA decarboxylase
LMNB2	3.4093	0.0214323	Q4_Reed_18d_tembryo_04_J24_378	XM_010724755.2	PREDICTED: Meleagris gallopavo lamin B2
TRMT1L	3.4065	0.0190229	Q4_Reed_1DPH_cDNA_10_D16_244	XM_010715527.3	PREDICTED: Meleagris gallopavo tRNA methyltransferase 1 like
RPL4	3.38162	0.0244016	Q2_Reed_1DPH_cDNA_02_K22_347	XM_031555227.1	PREDICTED: Meleagris gallopavo ribosomal protein L4
RBBP6	3.33377	0.0487151	Q1_Reed_18d_tembryo_01_A19_289	XM_025155142.1	PREDICTED: Gallus gallus RB binding protein 6, ubiquitin ligase (RBBP6), transcript variant X7, mRNA
PPFIBP1	3.33196	0.0144833	Q4_Reed_um_mg_cDNA1_04_13E02	XM_031555213.1	PREDICTED: Meleagris gallopavo PPFIA binding protein 1
INSIG1	3.33065	0.0175196	Q1_Reed_18d_tembryo_07_M15_237	XM_010712335.3	PREDICTED: Meleagris gallopavo insulin induced gene 1
UXS1	3.32207	0.0252092	Q1_Reed_1DPH_cDNA_06_O05_079	XM_010728139.3	PREDICTED: Meleagris gallopavo UDP-glucuronate decarboxylase 1
CDKN2AIP	3.30553	0.0190229	Q4_Reed_18d_tembryo_06_H18_280	XM_010709875.2	PREDICTED: Meleagris gallopavo CDKN2A interacting protein
SCARF1	3.30271	0.0252518	Q2_Reed_um_Mg_cDNA1_08_32H04	XM_010721726.3	PREDICTED: Meleagris gallopavo scavenger receptor class F member 1
LOC109370337	3.28167	0.0332252	Q2_Reed_UM_Mg_cDNA1_06_23G03	XR_002120387.1	PREDICTED: Meleagris gallopavo uncharacterized LOC109370337
ZFAND1	3.27829	0.0114589	Q4_Reed_UM_Mg_cDNA1_05_72H09	XM_019614125.2	PREDICTED: Meleagris gallopavo zinc finger AN1-type containing 1
UBA3	3.17779	0.0246278	Contig[0089]	XM_003210177.4	PREDICTED: Meleagris gallopavo ubiquitin like modifier activating enzyme 3
PPP2R2A	3.11174	0.0311914	Q1_Reed_18d_tembryo_07_A19_289	XM_010723093.3	PREDICTED: Meleagris gallopavo protein phosphatase 2 regulatory subunit Balpha
SPTBN1	3.10118	0.0175366	Contig[0548]	XM_010706345.3	PREDICTED: Meleagris gallopavo spectrin beta, non-erythrocytic 1
NOP2	3.09449	0.0256654	Q3_Reed_UM_Mg_cDNA1_05_75C10-C	XM_019611777.2	PREDICTED: Meleagris gallopavo NOP2 nucleolar protein
SUCLA2	3.06045	0.0451078	Q2_Reed_1DPH_cDNA_01_I18_281	XM_010728821.3	PREDICTED: Meleagris gallopavo succinate-CoA ligase ADP-forming beta subunit
PHF12	3.01299	0.0215945	Q2_Reed_um_Mg_cDNA_01_50B07	XM_010722121.3	PREDICTED: Meleagris gallopavo PHD finger protein 12
ZCCHC9	2.97425	0.0307721	Q1_Reed_1DPH_cDNA_01_C17_259	XM_010726092.3	PREDICTED: Meleagris gallopavo zinc finger CCHC-type containing 9
CCNI	2.94451	0.022506	Q2_Reed_18d_tembryo_01_I06_089	XM_031596760.1	PREDICTED: Phasianus colchicus cyclin I (CCNI), mRNA
RSRC1	2.94192	0.031577	Q3_Reed_UM_Mg_cDNA1_06_71G09	XM_031555020.1	PREDICTED: Meleagris gallopavo arginine and serine rich coiled-coil 1
EVA1B	2.92647	0.0337918	Q2_Reed_1DPH_cDNA_04_O22_351	XM_003212569.4	PREDICTED: Meleagris gallopavo eva-1 homolog B
LOC104911047	2.91765	0.0217593	Q3_Reed_1DPH_cDNA_01_N19_302	XR_793582.1	PREDICTED: Meleagris gallopavo uncharacterized LOC104911047
ACADSB	2.91028	0.0228033	Contig[1999]	XM_010714868.2	PREDICTED: Meleagris gallopavo acyl-CoA dehydrogenase short/branched chain
LOC116217087	2.88854	0.0458827	Contig[1577]	XM_031555288.1	PREDICTED: Meleagris gallopavo tropomyosin alpha-1 chain-like
FZD4	2.87981	0.0190229	Q1_Reed_UM_Mg_cDNA1_05_34B05	XM_010706198.3	PREDICTED: Meleagris gallopavo frizzled class receptor 4
RAB8B	2.87452	0.0475987	Q3_Reed_um_Mg_cDNA_01_62F08	XM_010717318.3	PREDICTED: Meleagris gallopavo RAB8B, member RAS oncogene family
HAGH	2.87436	0.0168906	Q4_Reed_16wkturkeymuscle_08_B02	XM_010719535.3	PREDICTED: Meleagris gallopavo hydroxyacylglutathione hydrolase
IWS1	2.86037	0.0199174	Contig[1069]	XM_003208952.3	PREDICTED: Meleagris gallopavo interacts with SUPT6H, CTD assembly factor 1
RSRC2	2.83863	0.0333769	Q3_Reed_um_mg_cDNA1_04_96H12	XM_010720161.3	PREDICTED: Meleagris gallopavo arginine and serine rich coiled-coil 2
BRD8	2.83592	0.0239834	Q4_Reed_um_Mg_cDNA1_09_57A08	XR_795251.2	PREDICTED: Meleagris gallopavo bromodomain containing 8
OLFML3	2.82481	0.02206	Q1_Reed_18d_tembryo_04_O11_175	XM_031557011.1	PREDICTED: Meleagris gallopavo olfactomedin like 3
ZC3H15	2.81511	0.0144833	Q3_Reed_16wkturkeymuscle_09_L23	XM_031554279.1	PREDICTED: Meleagris gallopavo zinc finger CCCH-type containing 15
undescribed transcript	2.81419	0.0380947	Q4_Reed_18d_tembryo_06_P10_160		undescribed transcript, chomosome 8
SAV1	2.8106	0.027397	Q1_Reed_um_Mg_cDNA1_08_48H06	XM_031553753.1	PREDICTED: Meleagris gallopavo salvador family WW domain containing protein 1
LOC100543106	2.8105	0.0253941	Q2_Reed_16wkturkeymuscle_07_M22	XM_010716988.3	PREDICTED: Meleagris gallopavo schwannomin-interacting protein 1
ND5	2.8057	0.0487105	Q1_Reed_16wkturkeymuscle_07_E07	JF275060.1	NADH dehydrogenase subunit 5
COL6A1	2.79753	0.0305638	Contig[2663]	XM_010713158.3	PREDICTED: Meleagris gallopavo collagen type VI alpha 1 chain
NAXD	2.79636	0.040135	Q4_Reed_1DPH_cDNA_01_B24_370	XM_003207857.4	PREDICTED: Meleagris gallopavo NAD(P)HX dehydratase
SPTBN1	2.7943	0.0348341	Q2_Reed_18d_tembryo_02_C08_115	XM_010706345.3	PREDICTED: Meleagris gallopavo spectrin beta, non-erythrocytic 1
AKAP13	2.78752	0.017383	Q4_Reed_UM_Mg_cDNA1_06_62F08	XM_031555334.1	PREDICTED: Meleagris gallopavo A-kinase anchoring protein 13
RBMX2	2.76415	0.0213356	Contig[2725]	XM_010715157.3	PREDICTED: Meleagris gallopavo RNA binding motif protein X-linked 2
LOC104909591	2.7583	0.0310335	Contig[0709]	XM_010706771.3	PREDICTED: Meleagris gallopavo cold shock domain-containing protein E1
NUDT13	2.73567	0.0238813	Q4_Reed_18d_tembryo_05_D04_052	XM_019617555.2	PREDICTED: Meleagris gallopavo nudix hydrolase 13
ARPP19	2.73286	0.0244016	Contig[2771]	XM_019619377.1	PREDICTED: Meleagris gallopavo cAMP regulated phosphoprotein 19
MBNL1	2.72147	0.0219216	Q1_Reed_1DPH_cDNA_02_K05_075	XM_010717050.2	PREDICTED: Meleagris gallopavo muscleblind like splicing regulator 1
EPRS1	2.7212	0.0274022	Q2_Reed_UM_Mg_cDNA1_05_70F09	XM_019612658.2	PREDICTED: Meleagris gallopavo glutamyl-prolyl-tRNA synthetase 1
ALDOC	2.70798	0.0307721	Q2_Reed_um_Mg_cDNA1_08_33A05	XM_003211757.4	PREDICTED: Meleagris gallopavo aldolase, fructose-bisphosphate C
MAML3	2.69001	0.0205373	KMR3635_C10_006	XM_031553011.1	PREDICTED: Meleagris gallopavo mastermind like transcriptional coactivator 3
VLDLR	2.67793	0.0283088	Q1_Reed_1DPH_cDNA_06_G03_039	XM_010725623.2	PREDICTED: Meleagris gallopavo very low density lipoprotein receptor
GPR137B	2.66855	0.0255876	Q4_Reed_16wkturkeymuscle_06_N04	XM_031552416.1	PREDICTED: Meleagris gallopavo G protein-coupled receptor 137B
PDLIM5	2.66219	0.0253256	Contig[0268]	XM_010710016.2	PREDICTED: Meleagris gallopavo PDZ and LIM domain 5
RPL26L1	2.64712	0.0455488	Contig[2616]	XM_003210284.4	PREDICTED: Meleagris gallopavo ribosomal protein L26 like 1
CHRDL2	2.61991	0.0158385	Q1_Reed_um_mg_cDNA1_04_41A06	XM_031606119.1	PREDICTED: Phasianus colchicus chordin like 2 (CHRDL2), mRNA
LOC116216206	2.5979	0.0168906	Q1_Reed_um_mg_cDNA1_02_25A04	XR_004158653.1	PREDICTED: Meleagris gallopavo uncharacterized LOC116216206
ACTN2	2.59309	0.0307721	Q2_Reed_16wkturkeyMuscle_01_E12	XM_003204009.2	PREDICTED: Meleagris gallopavo actinin alpha 2
SEC31B	2.58955	0.0328283	Q4_Reed_UM_Mg_cDNA1_07_79G10	XM_019617604.2	PREDICTED: Meleagris gallopavo SEC31 homolog B, COPII coat complex component
RSRP1	2.57488	0.0283957	Contig[0954]	XM_019622842.2	PREDICTED: Meleagris gallopavo arginine and serine rich protein 1
KDM2B	2.54389	0.0214323	Q4_Reed_16wkturkeymuscle_07_J08	XM_010720121.3	PREDICTED: Meleagris gallopavo lysine demethylase 2B
MACO1	2.52173	0.0253941	Q4_Reed_16wkturkeymuscle_07_J16	XM_019622740.2	PREDICTED: Meleagris gallopavo macoilin 1
RPL9	2.49874	0.0447855	Contig[2560]	XM_003205860.2	PREDICTED: Meleagris gallopavo ribosomal protein L9
AP1B1	2.49821	0.0307721	Q2_Reed_um_Mg_cDNA1_08_25A04	XM_031555911.1	PREDICTED: Meleagris gallopavo adaptor related protein complex 1 subunit beta 1
EAPP	2.48845	0.0333769	Q2_Reed_1DPH_cDNA_07_M22_349	XM_010711667.3	PREDICTED: Meleagris gallopavo E2F associated phosphoprotein
ADAM12	2.46395	0.0499057	Q1_Reed_um_mg_cDNA1_03_95G12	XM_031597316.1	PREDICTED: Phasianus colchicus ADAM metallopeptidase domain 12 (ADAM12), mRNA
TMX2	2.45879	0.0209222	Q1_Reed_1DPH_cDNA_01_G21_327	XM_003209038.3	PREDICTED: Meleagris gallopavo thioredoxin related transmembrane protein 2
HSP90AB1	2.45119	0.0321292	Contig[0996]	XR_792494.3	PREDICTED: Meleagris gallopavo heat shock protein 90 alpha family class B member 1
SIX4	2.43555	0.0272776	Q1_Reed_um_Mg_cDNA1_08_73A10	XM_021402800.1	PREDICTED: Numida meleagris SIX homeobox 4 (SIX4), mRNA
MRPL36	2.42655	0.0228033	Q4_Reed_Cardiac_10_16wk_04_B18_274	XM_031589119.1	PREDICTED: Phasianus colchicus mitochondrial ribosomal protein L36 (MRPL36), mRNA
LOC104911327	2.41775	0.0253941	Q1_Reed_1DPH_cDNA_08_A19_289	XR_793827.3	PREDICTED: Meleagris gallopavo uncharacterized LOC104911327
LDB3	2.41316	0.0467945	Q3_Reed_UM_Mg_cDNA1_05_02B01	XM_019617470.1	PREDICTED: Meleagris gallopavo LIM domain binding 3
RNF150	2.39095	0.0400128	Q2_Reed_18d_tembryo_01_K22_347	XR_003074787.1	PREDICTED: Gallus gallus ring finger protein 150 (RNF150), transcript variant X2, misc_RNA
CDV3	2.37144	0.0363346	Contig[0793]	XM_010712938.3	PREDICTED: Meleagris gallopavo CDV3 homolog
SMAP2	2.36111	0.0470736	Q3_Reed_um_Mg_cDNA_01_04D01	XM_010723315.3	PREDICTED: Meleagris gallopavo small ArfGAP2
LOC104913858	2.34747	0.031008	Q1_Reed_um_mg_cDNA1_03_47G06	XR_002120909.2	PREDICTED: Meleagris gallopavo uncharacterized LOC104913858
PTPN21	2.34086	0.0246261	Q3_Reed_18d_tembryo_07_D17_260	XM_031593120.1	PREDICTED: Phasianus colchicus protein tyrosine phosphatase non-receptor type 21 (PTPN21), transcript variant X3, mRNA
PAN2	2.33496	0.0475987	Q1_Reed_um_mg_cDNA1_03_60D08	XM_031557609.1	PREDICTED: Meleagris gallopavo poly(A) specific ribonuclease subunit PAN2
IFNGR2	2.32236	0.0475987	IFNgamma_Receptor	NM_001008676.2	Gallus gallus interferon gamma receptor 2 (interferon gamma transducer 1) (IFNGR2), mRNA
TNNT3	2.31	0.0246261	Q4_Reed_16wkturkeymuscle_07_H24	XM_010711026.1	PREDICTED: Meleagris gallopavo troponin T3, fast skeletal type
YTHDC1	2.30885	0.0307721	KMR3635_B05_003	XR_793329.3	PREDICTED: Meleagris gallopavo YTH domain containing 1
CEBPD	2.29573	0.0426317	Q1_Reed_1DPH_cDNA_04_O19_303	XM_031612939.1	PREDICTED: Phasianus colchicus CCAAT enhancer binding protein delta (CEBPD), mRNA
IL17RC	2.26278	0.02206	Q2_Reed_um_Mg_cDNA1_09_30F04	XM_031606896.1	PREDICTED: Phasianus colchicus interleukin 17 receptor C (IL17RC), mRNA
LOC104910552	2.25778	0.0257792	Q2_Reed_um_Mg_cDNA1_08_82B11	XM_010709557.3	PREDICTED: Meleagris gallopavo extracellular matrix protein FRAS1-like
THOC5	2.2083	0.0418814	Contig[1419]	XM_031556001.1	PREDICTED: Meleagris gallopavo THO complex 5
MYO18A	2.19975	0.0457065	Q1_Reed_18d_tembryo_01_K07_107	XM_019621868.2	PREDICTED: Meleagris gallopavo myosin XVIIIA
LOC104917410	2.18824	0.0455488	Q1_Reed_1DPH_02_02_13E02	XR_796846.3	PREDICTED: Meleagris gallopavo uncharacterized LOC104917410
LOC100546408	2.18732	0.0386888	Q4_Reed_16wkturkeymuscle_06_H06	XM_019617414.2	PREDICTED: Meleagris gallopavo glycerol-3-phosphate dehydrogenase, mitochondrial
MAT1A	2.1796	0.0466094	Q2_Reed_um_Mg_cDNA1_08_81A11-C	XM_003207784.4	PREDICTED: Meleagris gallopavo methionine adenosyltransferase 1A
SAP30BP	2.16304	0.0246278	Q1_Reed_18d_tembryo_05_C03_035	XM_019621687.2	PREDICTED: Meleagris gallopavo SAP30 binding protein
GPSM1	2.15789	0.0372715	Q2_Reed_18d_tembryo_07_C20_307	XR_004161675.1	PREDICTED: Meleagris gallopavo G protein signaling modulator 1
TMEM38A	2.15543	0.0253941	Q4_Reed_16wkturkeymuscle_09_N16	XM_003213321.4	PREDICTED: Meleagris gallopavo transmembrane protein 38A
LOC116216278	2.14398	0.0333769	Q4_Reed_18d_tembryo_07_N14_222	XM_031552301.1	PREDICTED: Meleagris gallopavo uncharacterized LOC116216278
MSL3	2.13832	0.0380947	Q3_Reed_um_Mg_cDNA1_08_31G04	XM_010726558.3	PREDICTED: Meleagris gallopavo MSL complex subunit 3
VLDLR	2.12823	0.0283555	Q2_Reed_UM_Mg_cDNA1_07_43C06	XM_010725623.2	PREDICTED: Meleagris gallopavo very low density lipoprotein receptor
MYLK2	2.12373	0.0300615	Q4_Reed_16wkturkeymuscle_06_H02	XM_031556613.1	PREDICTED: Meleagris gallopavo myosin light chain kinase 2
SERP1	2.12034	0.0470736	Q1_Reed_18d_tembryo_02_C17_259-C	XM_031603746.1	PREDICTED: Phasianus colchicus stress associated endoplasmic reticulum protein 1 (SERP1), mRNA
SIL1	2.11814	0.0498441	Contig[2686]	XM_019620342.2	PREDICTED: Meleagris gallopavo SIL1 nucleotide exchange factor
LOC116242914	2.10472	0.0441701	Contig[2865]	XR_004169842.1	PREDICTED: Phasianus colchicus uncharacterized LOC116242914 (LOC116242914), ncRNA
LOC104915965	2.10373	0.0445118	Q1_Reed_1DPH_cDNA_10_I19_297	XR_796500.2	PREDICTED: Meleagris gallopavo uncharacterized LOC104915965
S100A11	2.09676	0.0473621	Calgizarrin	NM_205166.2	Gallus gallus S100 calcium binding protein A11 (S100A11), mRNA
UBE2D2	2.09166	0.0491464	Q4_Reed_18d_tembryo_04_L06_092	XM_015293552.2	PREDICTED: Gallus gallus ubiquitin conjugating enzyme E2 D2 (UBE2D2), transcript variant X5, mRNA
CCNI	2.09062	0.0246278	Contig[1032]	XM_010709675.3	PREDICTED: Meleagris gallopavo cyclin I
MGRN1	2.08888	0.0246278	Q3_Reed_18d_tembryo_02_L19_300	XM_031555818.1	PREDICTED: Meleagris gallopavo mahogunin ring finger 1
COL5A1	2.06728	0.0416601	Q4_Reed_UM_Mg_cDNA1_05_17A03	XM_019621304.2	PREDICTED: Meleagris gallopavo collagen type V alpha 1 chain
RPS15	2.04774	0.0475987	Q1_Reed_1DPH_02_03_I01_009	XM_010725012.3	PREDICTED: Meleagris gallopavo ribosomal protein S15
DIAPH2	2.03741	0.0463302	Q2_Reed_1DPH_cDNA_04_I10_153	XM_019618162.2	PREDICTED: Meleagris gallopavo diaphanous related formin 2
GSPT1	2.02929	0.0473621	Contig[1024]	XM_010719719.3	PREDICTED: Meleagris gallopavo G1 to S phase transition 1
MMADHC	1.99482	0.0487151	Q3_Reed_1DPH_cDNA_03_D23_356	XM_003207757.3	PREDICTED: Meleagris gallopavo metabolism of cobalamin associated D
NUP85	1.98402	0.0394125	Q3_Reed_um_mg_cDNA1_02_87G11	XM_010721698.2	PREDICTED: Meleagris gallopavo nucleoporin 85
WTAP	1.94818	0.0380947	Q1_Reed_um_Mg_cDNA1_09_18B03	XM_031552449.1	PREDICTED: Meleagris gallopavo WT1 associated protein
LOC100539376	1.92002	0.0470736	Q1_Reed_1DPH_02_02_71G09	XM_010722816.3	PREDICTED: Meleagris gallopavo solute carrier family 35 member E2A-like
DAB2	1.79988	0.0475987	Q2_Reed_UM_Mg_cDNA1_07_57A08	XM_010725360.3	PREDICTED: Meleagris gallopavo DAB adaptor protein 2
SMARCD1	0.55349	0.0447855	Q2_Reed_1DPH_cDNA_09_I12_185	XM_010720540.3	PREDICTED: Meleagris gallopavo SWI/SNF related, matrix associated, actin dependent regulator of chromatin, subfamily d, member 1
RFC5	0.539065	0.0411677	Contig[2630]	XM_010720512.3	PREDICTED: Meleagris gallopavo replication factor C subunit 5
PLEKHB2	0.538481	0.0441701	Q1_Reed_18d_tembryo_05_C01_003	XM_010716626.3	PREDICTED: Meleagris gallopavo pleckstrin homology domain containing B2
SETD6	0.537328	0.0433424	Q2_Reed_18d_tembryo_06_I10_153	XM_010718040.3	PREDICTED: Meleagris gallopavo SET domain containing 6, protein lysine methyltransferase
LOC104911367	0.536807	0.0447855	Q3_Reed_um_mg_cDNA1_02_65A09	XM_010712472.1	PREDICTED: Meleagris gallopavo supervillin-like
EEF2	0.518011	0.0455488	Contig[0576]	XM_010724890.2	PREDICTED: Meleagris gallopavo eukaryotic translation elongation factor 2
RCN1	0.511389	0.0307721	Contig[2791]	XM_010710737.2	PREDICTED: Meleagris gallopavo reticulocalbin 1
NDFIP2	0.507853	0.0496145	Q3_Reed_UM_Mg_cDNA1_06_86F11	XM_031557826.1	PREDICTED: Meleagris gallopavo Nedd4 family interacting protein 2
LOC100550296	0.506166	0.0433398	Q1_Reed_1DPH_cDNA_12_C01_003	XM_010717783.3	PREDICTED: Meleagris gallopavo T-cell immunomodulatory protein
C7H2orf66	0.503982	0.0441701	Q4_Reed_1DPH_cDNA_07_P22_352	XM_010713395.3	PREDICTED: Meleagris gallopavo chromosome 7 C2orf66 homolog
COPA	0.503881	0.0349646	Contig[0012]-distance-m	XM_003213951.4	PREDICTED: Meleagris gallopavo COPI coat complex subunit alpha
ATP5F1C	0.500726	0.0365139	Contig[2156]-C	XM_010714391.3	PREDICTED: Meleagris gallopavo ATP synthase F1 subunit gamma
LOC116216870	0.492225	0.0487105	Q1_Reed_18d_tembryo_06_K19_299	XM_031554346.1	PREDICTED: Meleagris gallopavo erlin-1-like
ACAT1	0.492146	0.0490166	Contig[0928]	XM_031552069.1	PREDICTED: Meleagris gallopavo acetyl-CoA acetyltransferase 1
KDELR3	0.490665	0.0432265	Q4_Reed_18d_tembryo_01_H20_312	XM_003202280.4	PREDICTED: Meleagris gallopavo KDEL endoplasmic reticulum protein retention receptor 3
BIN1	0.488687	0.0419866	Q2_Reed_1DPH_cDNA_03_M14_221	XM_027462211.1	PREDICTED: Anas platyrhynchos bridging integrator 1 (BIN1), transcript variant X19, mRNA
PRMT5	0.484322	0.0271912	Contig[0654]	XM_019611008.1	PREDICTED: Meleagris gallopavo protein arginine methyltransferase 5
MED27	0.482033	0.0310335	Q3_Reed_18d_tembryo_05_L03_044	XM_003211284.4	PREDICTED: Meleagris gallopavo mediator complex subunit 27
FARSA	0.481472	0.044993	Contig[2505]	XM_010728036.3	PREDICTED: Meleagris gallopavo phenylalanyl-tRNA synthetase subunit alpha
PTP4A2	0.480555	0.0246278	Q1_Reed_um_Mg_cDNA1_08_19C03	XM_003212576.3	PREDICTED: Meleagris gallopavo protein tyrosine phosphatase 4A2
LARP4B	0.480291	0.0253256	Contig[2265]	XM_010712411.3	PREDICTED: Meleagris gallopavo La ribonucleoprotein 4B
FBXO9	0.47303	0.0402943	Q3_Reed_18d_tembryo_01_N09_142	XM_010707806.2	PREDICTED: Meleagris gallopavo F-box protein 9
NSUN5	0.47076	0.0326318	Q4_Reed_18d_tembryo_04_J22_346	XM_019621847.2	PREDICTED: Meleagris gallopavo NOP2/Sun RNA methyltransferase 5
TMED10	0.469055	0.0433424	Contig[2753]	XM_003206597.3	PREDICTED: Meleagris gallopavo transmembrane p24 trafficking protein 10
CEBPG	0.467021	0.0433398	Q4_Reed_um_Mg_cDNA1_09_21E03	XM_010717745.3	PREDICTED: Meleagris gallopavo CCAAT enhancer binding protein gamma
TWNK	0.463532	0.0252098	Q1_Reed_um_Mg_cDNA1_09_35C05	XM_010714746.2	PREDICTED: Meleagris gallopavo twinkle mtDNA helicase
TBL2	0.463083	0.0499057	Q4_Reed_1DPH_cDNA_05_J18_282	XM_019621943.2	PREDICTED: Meleagris gallopavo transducin beta like 2
GSN	0.462568	0.0472386	Contig[0899]-mismatch-3	XM_003211338.4	PREDICTED: Meleagris gallopavo gelsolin
USP9X	0.460345	0.0497295	Q1_Reed_16wkturkeymuscle_06_O13	XM_010724749.3	PREDICTED: Meleagris gallopavo ubiquitin specific peptidase 9 X-linked
MRPL38	0.459179	0.0373318	Q1_Reed_1DPH_cDNA_04_I17_265	XM_010721378.2	PREDICTED: Meleagris gallopavo mitochondrial ribosomal protein L38
CLBp	0.457101	0.0380947	Q1_Reed_um_mg_cDNA1_03_91C12	XM_021383132.1	PREDICTED: Numida meleagris ClpB homolog, mitochondrial AAA ATPase chaperonin (CLPB), transcript variant X3, mRNA
LOC100551374	0.455753	0.0363346	Q1_Reed_16wkturkeyMuscle_02_I07	XM_003209143.4	PREDICTED: Meleagris gallopavo deoxyribodipyrimidine photo-lyase-like
TXNRD3	0.455312	0.0253941	Q1_Reed_16wkturkeymuscle_09_M05	XM_010718544.3	PREDICTED: Meleagris gallopavo thioredoxin reductase 3
SLC25A4	0.455044	0.0370482	Q4_Reed_16wkTurkeyMuscle_03_F12	XM_003205518.3	PREDICTED: Meleagris gallopavo solute carrier family 25 member 4
EIF3D	0.454791	0.0415922	Contig[0397]-mismatch-3	XM_010712258.1	PREDICTED: Meleagris gallopavo eukaryotic translation initiation factor 3 subunit D
XBP1	0.453385	0.0386888	Contig[0980]	XM_031555904.1	PREDICTED: Meleagris gallopavo X-box binding protein 1
NFATC2	0.453237	0.0246278	NFAT	XM_417509.5	PREDICTED: Gallus gallus similar to nuclear factor of activated T-cells, cytoplasmic, calcineurin-dependent 2 (LOC419346)
PTGES2	0.449333	0.0447855	Q4_Reed_16wkTurkeyMuscle_04_F18	XM_010720847.2	PREDICTED: Meleagris gallopavo prostaglandin E synthase 2
LBR	0.44638	0.0300615	Q2_Reed_18d_tembryo_06_E22_341	XM_010706663.3	PREDICTED: Meleagris gallopavo lamin B receptor
APOO	0.445625	0.0495953	Q4_Reed_16wkTurkeyMuscle_04_D16	XM_010725857.3	PREDICTED: Meleagris gallopavo apolipoprotein O
WDR61	0.445531	0.0475987	Q1_Reed_1DPH_cDNA_02_M13_205	XM_010717341.3	PREDICTED: Meleagris gallopavo WD repeat domain 61
DCTN5	0.444811	0.0380947	Q1_Reed_um_mg_cDNA1_03_85E11	XM_003210696.4	PREDICTED: Meleagris gallopavo dynactin subunit 5
GOT2	0.443149	0.0310948	Contig[2816]	XM_003209677.3	PREDICTED: Meleagris gallopavo glutamic-oxaloacetic transaminase 2
BTF3L4	0.442392	0.022506	Contig[0905]	XM_010716122.2	PREDICTED: Meleagris gallopavo basic transcription factor 3 like 4
novel transcript	0.440628	0.0370482	Q3_Reed_um_mg_cDNA1_03_24H03
NOP58	0.438831	0.0455948	Q1_Reed_um_mg_cDNA1_03_03C01	XM_010713471.2	PREDICTED: Meleagris gallopavo NOP58 ribonucleoprotein
LOC104917600	0.43506	0.0244016	Q3_Reed_18d_tembryo_05_H07_104	XM_010729048.3	PREDICTED: Meleagris gallopavo paraspeckle component 1
DFFA	0.434735	0.0219216	Q2_Reed_1DPH_cDNA_10_O18_287	XM_019622463.2	PREDICTED: Meleagris gallopavo DNA fragmentation factor subunit alpha
COPS7A	0.433882	0.0419866	Q1_Reed_16wkturkeyMuscle_02_G23	XM_003202642.3	PREDICTED: Meleagris gallopavo COP9 signalosome subunit 7A
TBL1X	0.43222	0.0251346	Q3_Reed_um_Mg_cDNA_01_32H04	XM_010726686.3	PREDICTED: Meleagris gallopavo transducin beta like 1 X-linked
HSP90B1	0.431849	0.0251237	Contig[0414]-mismatch-3	XM_003202376.4	PREDICTED: Meleagris gallopavo heat shock protein 90 beta family member 1
LOC100538560	0.430772	0.0498441	Q3_Reed_1DPH_cDNA_06_B21_322	XM_010709673.3	PREDICTED: Meleagris gallopavo C-type lectin domain family 2 member D3-like
USP9X	0.430302	0.0317848	Q1_Reed_16wkturkeymuscle_09_G11	XM_010724749.3	PREDICTED: Meleagris gallopavo ubiquitin specific peptidase 9 X-linked
LOC109364375	0.425618	0.0475987	Q2_Reed_18d_tembryo_05_K10_155	XM_019611020.2	PREDICTED: Meleagris gallopavo NAD-dependent malic enzyme, mitochondrial-like
BTG2	0.425453	0.0252092	Contig[0592]	XM_031557023.1	PREDICTED: Meleagris gallopavo BTG anti-proliferation factor 2
NAA15	0.424671	0.0380947	Q4_Reed_16wkturkeymuscle_10_B10	XM_010709504.1	PREDICTED: Meleagris gallopavo N(alpha)-acetyltransferase 15, NatA auxiliary subunit
HIF1A	0.423782	0.0285651	Q2_Reed_18d_tembryo_06_M20_317	XM_010712056.3	PREDICTED: Meleagris gallopavo hypoxia inducible factor 1 subunit alpha
SUMO3	0.4208	0.02206	Contig[protein_(LOC770553)]comp	LOC770553	small ubiquitin-like modifier 3 [ Gallus gallus (chicken) ]
PPIB	0.419644	0.035144	Q1_Reed_1DPH_cDNA_02_G03_039	XM_031555197.1	PREDICTED: Meleagris gallopavo peptidylprolyl isomerase B
HADHB	0.416047	0.0434622	Contig[0898]	XM_003204564.4	PREDICTED: Meleagris gallopavo hydroxyacyl-CoA dehydrogenase trifunctional multienzyme complex subunit beta
ARHGDIA	0.415925	0.0375758	Contig[1640]	XM_010721347.3	PREDICTED: Meleagris gallopavo Rho GDP dissociation inhibitor alpha
QRICH1	0.412181	0.0197467	Q2_Reed_UM_Mg_cDNA1_06_73A10	XM_003210157.4	PREDICTED: Meleagris gallopavo glutamine rich 1
LOC100543343	0.411171	0.0246278	Q1_Reed_1DPH_02_02_63G08-C	XM_010726721.2	PREDICTED: Meleagris gallopavo NAD-dependent protein deacetylase sirtuin-2-like
CSDE1	0.409701	0.0400128	Q4_Reed_um_mg_cDNA1_04_58B08	XM_031557003.1	PREDICTED: Meleagris gallopavo cold shock domain containing E1
HSPBP1	0.407265	0.031008	Q1_Reed_um_Mg_cDNA1_09_72H09	XM_003213956.4	PREDICTED: Meleagris gallopavo HSPA (Hsp70) binding protein 1
KLC4	0.406957	0.0400949	Q2_Reed_1DPH_02_01_15G02	XM_010706418.3	PREDICTED: Meleagris gallopavo kinesin light chain 4
GOLGA3	0.406439	0.0195491	Q2_Reed_16wkTurkeyMuscle_03_E04	XM_010719995.3	PREDICTED: Meleagris gallopavo golgin A3
IST1	0.403711	0.0389608	Contig[1322]	XM_010718133.3	PREDICTED: Meleagris gallopavo IST1 factor associated with ESCRT-III
RPP40	0.401852	0.0270276	Q1_Reed_1DPH_cDNA_08_K11_171	XM_010708403.3	PREDICTED: Meleagris gallopavo ribonuclease P/MRP subunit p40
PARVG	0.401558	0.0314861	Q2_Reed_um_Mg_cDNA1_08_90B12	XM_010724930.3	PREDICTED: Meleagris gallopavo parvin gamma
BET1	0.398704	0.0231202	Q1_Reed_18d_tembryo_04_E07_101	XM_010712680.3	PREDICTED: Meleagris gallopavo Bet1 golgi vesicular membrane trafficking protein
ANXA7	0.398423	0.0277128	Q3_Reed_16wkTurkeyMuscle_04_J23	XM_010714397.3	PREDICTED: Meleagris gallopavo annexin A7
OLFML2A	0.397364	0.0217593	Contig[1494]	XM_031556251.1	PREDICTED: Meleagris gallopavo olfactomedin like 2A
LOC104913873	0.392293	0.0254925	Q3_Reed_16wkturkeymuscle_09_N19	XR_004159304.1	PREDICTED: Meleagris gallopavo uncharacterized LOC104913873
SLC25A6	0.391555	0.0453795	Contig[0667]	XM_010727462.1	PREDICTED: Meleagris gallopavo solute carrier family 25 member 6
DAZAP1	0.390631	0.0351797	Q4_Reed_1DPH_cDNA_01_J22_346	XM_031557141.1	PREDICTED: Meleagris gallopavo DAZ associated protein 1
WDR25	0.39053	0.0190229	Q3_Reed_1DPH_cDNA_04_P19_304	XM_031553674.1	PREDICTED: Meleagris gallopavo WD repeat domain 25
ENO1	0.388475	0.0168906	Q2_Reed_1DPH_cDNA_02_E20_309	XM_010722760.2	PREDICTED: Meleagris gallopavo enolase 1
COL1A2	0.387806	0.0439162	Q4_Reed_UM_Mg_cDNA1_06_25A04	XM_010712676.1	PREDICTED: Meleagris gallopavo collagen type I alpha 2 chain
LOC100544583	0.385917	0.023358	Q3_Reed_um_mg_cDNA1_03_13E02	XM_003213989.4	PREDICTED: Meleagris gallopavo actin, cytoplasmic 2-like
PLS1	0.385885	0.0252092	Q4_Reed_um_mg_cDNA1_04_82B11	XM_031555099.1	PREDICTED: Meleagris gallopavo plastin 1
ZDHHC9	0.385828	0.0215945	Q1_Reed_1DPH_cDNA_02_K13_203	XM_010715060.3	PREDICTED: Meleagris gallopavo zinc finger DHHC-type palmitoyltransferase 9
LOC100548827	0.383459	0.0215945	Q3_Reed_16wkTurkeyMuscle_04_B21	XM_010724068.2	PREDICTED: Meleagris gallopavo tubulin alpha-8 chain
HSP90B1	0.383187	0.0495953	Contig[0414]	XM_003202376.4	PREDICTED: Meleagris gallopavo heat shock protein 90 beta family member 1
LOC104911671	0.380158	0.023358	Q4_Reed_UM_Mg_cDNA1_07_52D07	XM_010713593.3	PREDICTED: Meleagris gallopavo myc box-dependent-interacting protein 1-like
PCMT1	0.379069	0.0228033	Q4_Reed_18d_tembryo_05_B14_210	XM_031552204.1	PREDICTED: Meleagris gallopavo protein-L-isoaspartate (D-aspartate) O-methyltransferase
CPSF6	0.378014	0.0307721	Q4_Reed_18d_tembryo_03_D08_116	XM_019611260.2	PREDICTED: Meleagris gallopavo cleavage and polyadenylation specific factor 6
LOC100550807	0.377972	0.0466094	Contig[0359]	XM_010715363.3	PREDICTED: Meleagris gallopavo phosphoglycerate kinase
NAA10	0.37605	0.0490166	Q1_Reed_UM_Mg_cDNA1_06_33A05	XM_031610512.1	PREDICTED: Phasianus colchicus N(alpha)-acetyltransferase 10, NatA catalytic subunit (NAA10), mRNA
PI4KA	0.375585	0.0318736	Q2_Reed_1DPH_cDNA_07_O22_351	XM_010719953.3	PREDICTED: Meleagris gallopavo phosphatidylinositol 4-kinase alpha
CTBP2	0.374691	0.0152501	Q1_Reed_18d_tembryo_03_O07_111	XM_019617872.2	PREDICTED: Meleagris gallopavo C-terminal binding protein 2
HELLS	0.370925	0.0389608	Q1_Reed_18d_tembryo_04_K03_043	XM_010714411.3	PREDICTED: Meleagris gallopavo helicase, lymphoid specific
PYCR1	0.370503	0.0244016	Q1_Reed_18d_tembryo_02_K01_011	XM_010721352.1	PREDICTED: Meleagris gallopavo pyrroline-5-carboxylate reductase 1
TPP2	0.370415	0.0236184	Q2_Reed_16wkTurkeyMuscle_01_O10	XM_031557703.1	PREDICTED: Meleagris gallopavo tripeptidyl peptidase 2
CIB1	0.369242	0.031008	Contig[0014]	XM_010717701.1	PREDICTED: Meleagris gallopavo calcium and integrin binding 1
FUCA1	0.369161	0.0285507	Q2_Reed_UM_Mg_cDNA1_06_74B10	XM_010723536.2	PREDICTED: Meleagris gallopavo alpha-L-fucosidase 1
CTSB	0.366995	0.0490166	Q2_Reed_18d_tembryo_05_C18_275	XM_019613436.1	PREDICTED: Meleagris gallopavo cathepsin B
LOC100549893	0.364261	0.0168906	Contig[0675]	XM_010718524.2	PREDICTED: Meleagris gallopavo cytochrome b-c1 complex subunit 1, mitochondrial
PSMC3	0.362579	0.0213356	Contig[0662]	XM_010711376.2	PREDICTED: Meleagris gallopavo proteasome 26S subunit, ATPase 3
PRCP	0.360476	0.0417104	Q3_Reed_1DPH_cDNA_07_D07_100	XM_003203536.4	PREDICTED: Meleagris gallopavo prolylcarboxypeptidase
LOC104911651	0.360352	0.0252518	Q1_Reed_UM_Mg_cDNA1_06_13E02	XM_019615880.1	PREDICTED: Meleagris gallopavo nucleoporin Nup37-like
SERINC3	0.358203	0.0219216	Contig[1035]	XM_003211978.4	PREDICTED: Meleagris gallopavo serine incorporator 3
RCL1	0.357562	0.0455488	Q2_Reed_um_mg_cDNA1_02_42B06	XM_031557280.1	PREDICTED: Meleagris gallopavo RNA terminal phosphate cyclase like 1
LOC100545426	0.35543	0.0147227	Q4_Reed_16wkturkeymuscle_10_D20	XM_031552588.1	PREDICTED: Meleagris gallopavo ATP-binding cassette sub-family F member 2
LRPPRC	0.355396	0.0307721	Q1_Reed_1DPH_cDNA_01_M11_173	XM_019612713.2	PREDICTED: Meleagris gallopavo leucine rich pentatricopeptide repeat containing
PSMD6	0.355223	0.0168906	Q4_Reed_UM_Mg_cDNA1_06_92D12	XM_010718670.1	PREDICTED: Meleagris gallopavo proteasome 26S subunit, non-ATPase 6
PHB	0.353642	0.0236184	Q4_Reed_1DPH_cDNA_01_P20_320	XM_003213060.3	PREDICTED: Meleagris gallopavo prohibitin
LOC100540318	0.348311	0.0329534	Q1_Reed_um_Mg_cDNA1_08_49A07	XM_019610240.2	PREDICTED: Meleagris gallopavo protein O-glucosyltransferase 2
LOC116216167	0.346798	0.024004	Q3_Reed_um_mg_cDNA1_03_32H04	XM_010713873.3	PREDICTED: Meleagris gallopavo aldo-keto reductase family 1 member B10-like
PPP1CA	0.346476	0.0400949	Q1_Reed_1DPH_cDNA_09_C17_259-C	XM_010727979.1	PREDICTED: Meleagris gallopavo protein phosphatase 1 catalytic subunit alpha
PSMC5	0.34569	0.0307721	Contig[1135]	NM_001293049.1	Meleagris gallopavo proteasome 26S subunit, ATPase 5
LOC100545462	0.344893	0.0310335	Q2_Reed_um_mg_cDNA1_03_42B06	XM_010709814.3	PREDICTED: Meleagris gallopavo tubulin alpha-3 chain
ANKRA2	0.344744	0.0147227	Q3_Reed_16wkTurkeyMuscle_03_D03	XM_010726642.2	PREDICTED: Meleagris gallopavo ankyrin repeat family A member 2
BZW2	0.342995	0.0490166	Contig[1913]	XM_003207112.2	PREDICTED: Meleagris gallopavo basic leucine zipper and W2 domains 2
ANXA6	0.341965	0.0138583	Q2_Reed_UM_Mg_cDNA1_06_03C01	XM_010719149.3	PREDICTED: Meleagris gallopavo annexin A6
PGAM1	0.340078	0.0475987	Contig[0042]	XM_010714739.2	PREDICTED: Meleagris gallopavo phosphoglycerate mutase 1
RAP2C	0.339952	0.0441701	Q1_Reed_16wkturkeyMuscle_03_C21	XM_010715410.1	PREDICTED: Meleagris gallopavo RAP2C, member of RAS oncogene family
TTL	0.339262	0.017383	Q1_Reed_1DPH_cDNA_12_C15_227	XM_010706562.1	PREDICTED: Meleagris gallopavo tubulin tyrosine ligase
ITGA6	0.338709	0.0310948	Q4_Reed_um_Mg_cDNA1_09_39G05	XM_010713747.3	PREDICTED: Meleagris gallopavo integrin subunit alpha 6
RCOR1	0.338294	0.0363346	Q1_Reed_18d_tembryo_06_O23_367	XM_031553690.1	PREDICTED: Meleagris gallopavo REST corepressor 1
SNRPB	0.337222	0.0439162	Contig[2142]	XM_019622101.1	PREDICTED: Meleagris gallopavo small nuclear ribonucleoprotein polypeptides B and B1
LOC104917388	0.335961	0.0317261	Q1_Reed_1DPH_cDNA_03_M13_205	XR_796838.2	PREDICTED: Meleagris gallopavo uncharacterized LOC104917388
RAC1	0.335928	0.035144	Q3_Reed_um_mg_cDNA1_04_14F02	XM_021406417.1	PREDICTED: Numida meleagris p21 (RAC1) activated kinase 3 (PAK3), transcript variant X3, mRNA
ARHGAP19	0.335293	0.0252098	Q3_Reed_1DPH_02_03_H17_264	XM_010714612.3	PREDICTED: Meleagris gallopavo Rho GTPase activating protein 19
PPFIBP1	0.330674	0.0228033	Q2_Reed_UM_Mg_cDNA1_07_38F05	XM_031555213.1	PREDICTED: Meleagris gallopavo PPFIA binding protein 1
SCP2	0.330127	0.0454231	Q1_Reed_1DPH_cDNA_11_I05_073	XM_003208849.4	PREDICTED: Meleagris gallopavo sterol carrier protein 2
FARSB	0.328854	0.0387751	Contig[2164]	XM_031555071.1	PREDICTED: Meleagris gallopavo phenylalanyl-tRNA synthetase subunit beta
VPS35	0.322981	0.0292734	Q3_Reed_1DPH_02_01_26B04	XM_019619741.2	PREDICTED: Meleagris gallopavo VPS35 retromer complex component
NDUFA9	0.322185	0.0138583	Contig[0810]	XM_010716570.3	PREDICTED: Meleagris gallopavo NADH:ubiquinone oxidoreductase subunit A9
CORO1C	0.322047	0.0278196	Q1_Reed_16wkturkeymuscle_07_I17	XM_003210959.4	PREDICTED: Meleagris gallopavo coronin 1C
PSMD3	0.321016	0.017383	Contig[2785]	XM_010724585.3	PREDICTED: Meleagris gallopavo proteasome 26S subunit, non-ATPase 3
DNAJB14	0.320417	0.0168906	Q3_Reed_16wkTurkeyMuscle_01_H15	XM_003205760.4	PREDICTED: Meleagris gallopavo DnaJ heat shock protein family (Hsp40) member B14
UBE2D3	0.319012	0.0278196	Contig[0044]	XM_010710052.3	PREDICTED: Meleagris gallopavo ubiquitin conjugating enzyme E2 D3
LOC100548156	0.318838	0.0370482	Contig[1456]	XM_010719776.1	PREDICTED: Meleagris gallopavo ras-related C3 botulinum toxin substrate 1
DNAJB6	0.317268	0.0246278	Q1_Reed_UM_Mg_cDNA1_10_63G08	XM_003206958.3	PREDICTED: Meleagris gallopavo DnaJ heat shock protein family (Hsp40) member B6
UFSP2	0.317158	0.0475987	Q1_Reed_16wkturkeyMuscle_01_M09_141	XM_010709785.3	PREDICTED: Meleagris gallopavo UFM1 specific peptidase 2
CCNA2	0.316114	0.0110507	Cyclin_A2-distance-m	XM_010709932.3	PREDICTED: Meleagris gallopavo cyclin A2 (CCNA2), mRNA
CENPL	0.31577	0.0228033	Contig[2544]	XM_010715918.3	PREDICTED: Meleagris gallopavo centromere protein L
ITM2B	0.30964	0.0363346	Q2_Reed_1DPH_cDNA_07_G20_311	XM_010728818.2	PREDICTED: Meleagris gallopavo integral membrane protein 2B
VDAC3	0.308657	0.0168906	Contig[0783]	XM_010723153.3	PREDICTED: Meleagris gallopavo voltage dependent anion channel 3
POLR2C	0.307864	0.0168906	Q4_Reed_UM_Mg_cDNA1_05_04D01	XM_010718015.3	PREDICTED: Meleagris gallopavo RNA polymerase II subunit C
ZNF207	0.306842	0.0144833	Q2_Reed_18d_tembryo_06_M06_093	XM_031556345.1	PREDICTED: Meleagris gallopavo zinc finger protein 207
MED30	0.305724	0.022506	Q1_Reed_18d_tembryo_03_C19_291	XM_003205242.4	PREDICTED: Meleagris gallopavo mediator complex subunit 30
HNRNPU	0.30105	0.0246278	Q4_Reed_1DPH_cDNA_07_P20_320	XM_019613489.2	PREDICTED: Meleagris gallopavo heterogeneous nuclear ribonucleoprotein U
COL1A2	0.300678	0.0147227	Contig[2482]	XM_010712676.1	PREDICTED: Meleagris gallopavo collagen type I alpha 2 chain
STMN1	0.300549	0.0487105	Contig[0586]	XM_010723369.2	PREDICTED: Meleagris gallopavo stathmin 1
PKIG	0.292526	0.00993702	Q1_Reed_16wkturkeymuscle_08_I09	XM_010722299.2	PREDICTED: Meleagris gallopavo cAMP-dependent protein kinase inhibitor gamma
LOC104915771	0.292463	0.0147227	Q4_Reed_1DPH_cDNA_12_J18_282	XR_004162324.1	PREDICTED: Meleagris gallopavo uncharacterized LOC104915771
CCNDBP1	0.291654	0.0103713	Q2_Reed_16wkturkeymuscle_05_K06	XM_010722441.3	PREDICTED: Meleagris gallopavo cyclin D1 binding protein 1
LOC100543617	0.289555	0.0345334	Q1_Reed_1DPH_cDNA_02_A13_193	XM_010710908.3	PREDICTED: Meleagris gallopavo transaldolase-like
LOC100538893	0.286898	0.017383	Contig[2740]	XM_010713639.2	PREDICTED: Meleagris gallopavo tubulin alpha-5 chain
LOC110392031	0.286063	0.0169503	Q1_Reed_1DPH_cDNA_05_E01_005	XM_021383972.1	PREDICTED: Numida meleagris ubiquinol-cytochrome-c reductase complex assembly factor 3 (LOC110392031), mRNA
EEF1A1	0.285901	0.0168906	Contig[2231]	XM_003204404.2	PREDICTED: Meleagris gallopavo eukaryotic translation elongation factor 1 alpha 1
PPP2CA	0.28384	0.0300615	Q4_Reed_18d_tembryo_06_F16_246	XM_019620528.2	PREDICTED: Meleagris gallopavo protein phosphatase 2 catalytic subunit alpha
PSMD11	0.283047	0.0168906	Q1_Reed_UM_Mg_cDNA1_06_26B04	XM_010726679.2	PREDICTED: Meleagris gallopavo proteasome 26S subunit, non-ATPase 11
LOC100539282	0.281519	0.0202325	Q3_Reed_um_mg_cDNA1_03_69E09	XM_010724172.3	PREDICTED: Meleagris gallopavo ICOS ligand
SAR1A	0.280722	0.0244016	Q3_Reed_um_Mg_cDNA_01_78F10	XM_010714314.2	PREDICTED: Meleagris gallopavo secretion associated Ras related GTPase 1A
ANXA5	0.280645	0.0375758	Contig[2549]	XM_010709935.3	PREDICTED: Meleagris gallopavo annexin A5
LOC100543527	0.279938	0.0167803	Contig[1929]	XM_031554765.1	PREDICTED: Meleagris gallopavo cytochrome c-type heme lyase
DLST	0.276296	0.0149094	Contig[2342]	NM_001012901.1	Gallus gallus dihydrolipoamide S-succinyltransferase (DLST), mRNA
ATP2A3	0.275648	0.017383	Q4_Reed_1DPH_cDNA_10_J20_314	XM_003211678.4	PREDICTED: Meleagris gallopavo ATPase sarcoplasmic/endoplasmic reticulum Ca2+ transporting 3
ATIC	0.274522	0.0307721	Q4_Reed_UM_Mg_cDNA1_06_70F09	XM_003207379.4	PREDICTED: Meleagris gallopavo 5-aminoimidazole-4-carboxamide ribonucleotide formyltransferase/IMP cyclohydrolase
LOC100541641	0.272342	0.0481898	Contig[1084]-C	XM_010725523.3	PREDICTED: Meleagris gallopavo betaine--homocysteine S-methyltransferase 1
NDUFS3	0.272034	0.0370751	Q3_Reed_1DPH_cDNA_12_B13_194	XM_019616099.1	PREDICTED: Meleagris gallopavo NADH:ubiquinone oxidoreductase core subunit S3
DLD	0.269995	0.00993702	Q3_Reed_18d_tembryo_07_J09_138	XM_010722061.3	PREDICTED: Meleagris gallopavo dihydrolipoamide dehydrogenase
RAB24	0.268303	0.0144833	Q2_Reed_1DPH_cDNA_01_I22_345	XM_010719061.2	PREDICTED: Meleagris gallopavo RAB24, member RAS oncogene family
MELK	0.261488	0.0165302	Q2_Reed_18d_tembryo_01_I24_377	XM_031552518.1	PREDICTED: Meleagris gallopavo maternal embryonic leucine zipper kinase
RPL7L1	0.261279	0.0175366	Contig[1655]	XM_010709940.3	PREDICTED: Meleagris gallopavo ribosomal protein L7 like 1
EIF4G2	0.259194	0.0207548	Q2_Reed_18d_tembryo_07_O16_255	XM_010710988.3	PREDICTED: Meleagris gallopavo eukaryotic translation initiation factor 4 gamma 2
IARS1	0.258603	0.0181476	Q2_Reed_18d_tembryo_06_C06_083	XM_010718400.3	PREDICTED: Meleagris gallopavo isoleucyl-tRNA synthetase 1
ATP6V1B2	0.255373	0.0487105	Q1_Reed_16wkturkeymuscle_10_A19	XM_010723099.3	PREDICTED: Meleagris gallopavo ATPase H+ transporting V1 subunit B2
PBK	0.247975	0.0244016	Q2_Reed_1DPH_02_01_69E09	XM_010708053.2	PREDICTED: Meleagris gallopavo PDZ binding kinase
ELOVL5	0.247811	0.0161223	Q1_Reed_1DPH_cDNA_10_E11_165	XM_003204431.4	PREDICTED: Meleagris gallopavo ELOVL fatty acid elongase 5
EIF4E	0.244618	0.0470879	Contig[0936]	XM_010710101.3	PREDICTED: Meleagris gallopavo eukaryotic translation initiation factor 4E
HAT1	0.241506	0.02206	Q3_Reed_um_Mg_cDNA_01_20D03	XM_010713746.3	PREDICTED: Meleagris gallopavo histone acetyltransferase 1
CNBP	0.238916	0.0252092	Contig[1995]	XM_010718441.3	PREDICTED: Meleagris gallopavo CCHC-type zinc finger nucleic acid binding protein
AKT1	0.236908	0.0144833	AKT1	NM_205055	Gallus gallus v-akt murine thymoma viral oncogene homolog 1 (AKT1), mRNA
TMEM70	0.236598	0.0433398	Q1_Reed_1DPH_02_02_95G12	XM_019614364.1	PREDICTED: Meleagris gallopavo transmembrane protein 70
ANTXRL	0.236392	0.0138583	Q1_Reed_um_mg_cDNA1_04_88H11	XM_003207995.4	PREDICTED: Meleagris gallopavo ANTXR like
CCT3	0.235854	0.0225132	Q2_Reed_18d_tembryo_04_O16_255	XM_010728379.2	PREDICTED: Meleagris gallopavo chaperonin containing TCP1 subunit 3
DAP	0.235589	0.0238813	Q4_Reed_1DPH_cDNA_05_F24_374	XM_010708504.1	PREDICTED: Meleagris gallopavo death associated protein
EEF2	0.23371	0.0103713	Contig[0620]	XM_010724890.2	PREDICTED: Meleagris gallopavo eukaryotic translation elongation factor 2
PPP1CA	0.232715	0.0400949	Q2_Reed_UM_Mg_cDNA1_07_75C10	XM_010727979.1	PREDICTED: Meleagris gallopavo protein phosphatase 1 catalytic subunit alpha
SOD2	0.232099	0.0326318	Superoxide_dismutase_SOD2_	XM_031552450.1	PREDICTED: Meleagris gallopavo superoxide dismutase 2 (SOD2), mRNA
NDUFV1	0.232026	0.023171	Contig[0978]	XM_010710815.3	PREDICTED: Meleagris gallopavo NADH:ubiquinone oxidoreductase core subunit V1
ACTB	0.228898	0.0390694	Contig[0560]	NM_001303173.1	Meleagris gallopavo actin beta
EIF2S1	0.226686	0.0246278	Q3_Reed_1DPH_cDNA_01_P17_272	XM_003206500.3	PREDICTED: Meleagris gallopavo eukaryotic translation initiation factor 2 subunit alpha
EEF1A1	0.226128	0.0274022	Contig[1000]	XM_003204404.2	PREDICTED: Meleagris gallopavo eukaryotic translation elongation factor 1 alpha 1
HIBCH	0.223769	0.0103284	Contig[2829]	XM_031554139.1	PREDICTED: Meleagris gallopavo 3-hydroxyisobutyryl-CoA hydrolase
RNH1	0.220904	0.0305638	Q3_Reed_um_mg_cDNA1_03_72H09	XM_010711161.3	PREDICTED: Meleagris gallopavo ribonuclease/angiogenin inhibitor 1
POLDIP2	0.217395	0.00993702	Q1_Reed_1DPH_02_03_E07_101	XM_010721879.2	PREDICTED: Meleagris gallopavo DNA polymerase delta interacting protein 2
CDK1	0.214753	0.023358	CDK	XM_015288064.2	PREDICTED: Gallus gallus cyclin dependent kinase 1 (CDK1), transcript variant X2, mRNA
HSP90B1	0.214001	0.0175233	Contig[0414]-distance-3	XM_003202376.4	PREDICTED: Meleagris gallopavo heat shock protein 90 beta family member 1
COL1A2	0.20994	0.0246278	Contig[0436]	XM_010712676.1	PREDICTED: Meleagris gallopavo collagen type I alpha 2 chain
RACGAP1	0.209755	0.0175366	Q2_Reed_18d_tembryo_06_I20_313	XM_010720542.3	PREDICTED: Meleagris gallopavo Rac GTPase activating protein 1
VDAC3	0.209137	0.0169896	Q2_Reed_UM_Mg_cDNA1_07_23G03-C	XM_003212408.4	PREDICTED: Meleagris gallopavo voltage dependent anion channel 3
LOC100541641	0.208961	0.0307721	Q4_Reed_um_Mg_cDNA1_09_71G09	XM_010725523.3	PREDICTED: Meleagris gallopavo betaine--homocysteine S-methyltransferase 1
IGSF9	0.208833	0.0168906	Q3_Reed_18d_tembryo_03_B03_034	XM_010723952.3	PREDICTED: Meleagris gallopavo immunoglobulin superfamily member 9
DRG1	0.207491	0.00993702	Q1_Reed_1DPH_cDNA_08_K23_363	XM_010720265.3	PREDICTED: Meleagris gallopavo developmentally regulated GTP binding protein 1
TOP2A	0.20326	0.0300615	Q4_Reed_1DPH_cDNA_09_J20_314	XM_010724733.2	PREDICTED: Meleagris gallopavo DNA topoisomerase II alpha
CSNK2B	0.200471	0.02206	Contig[casein_kinase_II_beta_su	M59458	Chicken casein kinase II beta subunit mRNA
HSPA8	0.199744	0.0206383	Contig[0550]	XM_003212698.4	PREDICTED: Meleagris gallopavo heat shock protein family A (Hsp70) member 8
LOC104911018	0.198023	0.0321292	Contig[1199]	XM_010711068.3	PREDICTED: Meleagris gallopavo L-lactate dehydrogenase A chain
SELENOT	0.192447	0.02206	Selenoprotein_SEL-T_	NM_001006557.4	Gallus gallus selenoprotein T (SELENOT), mRNA
LOC100548498	0.191148	0.0252092	Q2_Reed_UM_Mg_cDNA1_05_43C06	XM_031554730.1	PREDICTED: Meleagris gallopavo pre-mRNA 3'-end-processing factor FIP1-like
PSMB7	0.190852	0.0228033	Contig[0977]	XM_010721064.2	PREDICTED: Meleagris gallopavo proteasome 20S subunit beta 7
LOC100548156	0.187754	0.038207	Q2_Reed_UM_Mg_cDNA1_05_01A01	XM_010719776.1	PREDICTED: Meleagris gallopavo ras-related C3 botulinum toxin substrate 1
KARS1	0.185664	0.0370751	Contig[0690]	XM_010718110.3	PREDICTED: Meleagris gallopavo lysyl-tRNA synthetase 1
LOC100545141	0.181018	0.0190229	Q2_Reed_16wkturkeymuscle_06_O18	XM_010724872.3	PREDICTED: Meleagris gallopavo acidic leucine-rich nuclear phosphoprotein 32 family member B
ACTB	0.180505	0.02206	Contig[1077]	NM_001303173.1	Meleagris gallopavo actin beta
HNRNPA0	0.179688	0.0144833	Q3_Reed_16wkTurkeyMuscle_02_P07	XM_025155023.1	PREDICTED: Gallus gallus heterogeneous nuclear ribonucleoprotein A0 (HNRNPA0), mRNA
RNH1	0.178124	0.0219216	Q1_Reed_UM_Mg_cDNA1_05_18B03	XM_010711161.3	PREDICTED: Meleagris gallopavo ribonuclease/angiogenin inhibitor 1
KPNA4	0.176338	0.0108707	Q1_Reed_um_Mg_cDNA1_09_91C12	XM_010716979.3	PREDICTED: Meleagris gallopavo karyopherin subunit alpha 4
SDHA	0.175632	0.00993702	Contig[1022]	XM_010708606.3	PREDICTED: Meleagris gallopavo succinate dehydrogenase complex flavoprotein subunit A
PPAT	0.174546	0.0190958	Q1_Reed_1DPH_cDNA_01_K21_331	XM_010710158.3	PREDICTED: Meleagris gallopavo phosphoribosyl pyrophosphate amidotransferase
ALDOC	0.172682	0.0266675	Contig[0255]	XM_003211757.4	PREDICTED: Meleagris gallopavo aldolase, fructose-bisphosphate C
YWHAQ	0.171559	0.0278196	Q3_Reed_UM_Mg_cDNA1_10_07G01	XM_010707922.3	PREDICTED: Meleagris gallopavo tyrosine 3-monooxygenase/tryptophan 5-monooxygenase activation protein theta
TPI1	0.171555	0.0205005	Contig[0030]	XM_010717832.3	PREDICTED: Meleagris gallopavo triosephosphate isomerase 1
DARS1	0.166991	0.0110507	Q1_Reed_18d_tembryo_01_G07_103	XM_010714025.3	PREDICTED: Meleagris gallopavo aspartyl-tRNA synthetase 1
HDLBP	0.166511	0.02206	Contig[1673]	XM_010716510.2	PREDICTED: Meleagris gallopavo high density lipoprotein binding protein
RAN	0.16566	0.0158385	Contig[0705]	XM_010720039.3	PREDICTED: Meleagris gallopavo RAN, member RAS oncogene family
EEF1A1	0.164476	0.0246278	Q4_Reed_um_mg_cDNA1_02_73A10	XM_003204404.2	PREDICTED: Meleagris gallopavo eukaryotic translation elongation factor 1 alpha 1
CCT4	0.16336	0.0147227	Contig[0422]	XM_010706585.3	PREDICTED: Meleagris gallopavo chaperonin containing TCP1 subunit 4
DDX5	0.162478	0.0246278	Q1_Reed_1DPH_cDNA_05_K23_363	XM_031556384.1	PREDICTED: Meleagris gallopavo DEAD-box helicase 5
CALM2	0.158152	0.0490166	Contig[calmodulin_2_(phosphoryl	XM_032102795.1	PREDICTED: Corvus moneduloides calmodulin 2 (CALM2), mRNA
PCOLCE2	0.156431	0.0215945	Contig[2858]	XM_031555067.1	PREDICTED: Meleagris gallopavo procollagen C-endopeptidase enhancer 2
NES	0.153271	0.0168906	Contig[0566]	XM_010723856.3	PREDICTED: Meleagris gallopavo nestin
COPE	0.153185	0.0467945	Contig[1081]	XM_003213287.4	PREDICTED: Meleagris gallopavo COPI coat complex subunit epsilon
ANXA6	0.152212	0.0147227	Contig[0392]	XM_003210394.4	PREDICTED: Meleagris gallopavo annexin A6
P4HB	0.137869	0.0101586	Q4_Reed_1DPH_cDNA_04_L08_124	XM_010721438.1	PREDICTED: Meleagris gallopavo prolyl 4-hydroxylase subunit beta
TUBB4B	0.135883	0.0305638	Contig[1025]	XM_019621366.1	PREDICTED: Meleagris gallopavo tubulin beta 4B class IVb
LOC100541641	0.124945	0.0455948	Contig[1084]	XM_010725523.3	PREDICTED: Meleagris gallopavo betaine--homocysteine S-methyltransferase 1
LOC100539974	0.117008	0.0147227	Q2_Reed_um_mg_cDNA1_03_25A04	XM_010726936.3	PREDICTED: Meleagris gallopavo tubulin alpha-1B chain
SPARC	0.115652	0.02206	Contig[0005]	XM_010719154.3	PREDICTED: Meleagris gallopavo secreted protein acidic and cysteine rich
ALDOC	0.114053	0.0441701	Contig[2741]	XM_003211757.4	PREDICTED: Meleagris gallopavo aldolase, fructose-bisphosphate C
CCT2	0.113744	0.0147227	Contig[2636]	XM_010708013.3	PREDICTED: Meleagris gallopavo chaperonin containing TCP1 subunit 2
ENO1	0.107381	0.0144833	Q3_Reed_UM_Mg_cDNA1_06_74B10	XM_010722760.2	PREDICTED: Meleagris gallopavo enolase 1
COL1A2	0.107313	0.0158385	Contig[2482]-C	XM_010712676.1	PREDICTED: Meleagris gallopavo collagen type I alpha 2 chain
ENO1	0.100938	0.0475987	Q3_Reed_UM_Mg_cDNA1_10_55G07	XM_010722759.2	PREDICTED: Meleagris gallopavo enolase 1
LOC100539974	0.0904056	0.02206	Contig[0295]	XM_010726936.3	PREDICTED: Meleagris gallopavo tubulin alpha-1B chain
ENO1	0.0782293	0.0206383	Q3_Reed_UM_Mg_cDNA1_06_74B10-C	XM_010722760.2	PREDICTED: Meleagris gallopavo enolase 1
CIRBP	0.0749206	0.0219216	Contig[0682]	XR_004162526.1	PREDICTED: Meleagris gallopavo cold inducible RNA binding protein
SYNCRIP	0.0600885	0.0144833	Q4_Reed_1DPH_cDNA_04_B06_082	XM_031552541.1	PREDICTED: Meleagris gallopavo synaptotagmin binding cytoplasmic RNA interacting protein
repetitive element	0.0408483	0.00381306	Q4_Reed_um_Mg_cDNA1_08_71G09		repetitive element
