# Supplementary material for: Knockdown of Death-Associated Protein Expression Induces Global Transcriptome Changes in Proliferating and Differentiating Muscle Satellite Cells
Source: Front Physiol. 2020 Aug 14;11:1036. doi: 10.3389/fphys.2020.01036 (PMC7457014; doi:10.3389/fphys.2020.01036)
Supplement: Supplementary file 3 [file Table_3.XLSX]

## Sheet: Sheet1
Table S3: Differentially Expressed Genes in Differentiating Satellite Cells Following DAP Knockdown
	Gene	Fold Change	Adjusted p value	Probe name	Accession	Description
1	16S RNA	10.9029	0.0283148	Contig[1982]	JF275060.1	Meleagris gallopavo strain Nicholas mitochondrion, complete genome
2	FTH1	10.0352	0.0029801	Q1_Reed_1DPH_cDNA_10_C13_195	XM_019616075.2	PREDICTED: Meleagris gallopavo ferritin heavy chain 1
3	CSPG4	8.43246	0.0462875	Q2_Reed_18d_tembryo_05_A22_337	XM_010717220.3	PREDICTED: Meleagris gallopavo chondroitin sulfate proteoglycan 4
4	PG-M	7.93048	0.00596704	Proteoglycan	X60226.1	G.gallus PG-M mRNA for proteoglycan
5	CCND1	7.46728	0.00875904	Q4_Reed_um_Mg_cDNA1_08_18B03	XM_010711209.3	PREDICTED: Meleagris gallopavo cyclin D1
6	LOC104909666	6.68689	0.00259413	Q1_Reed_UM_Mg_cDNA1_07_12D02	XM_010706942.1	PREDICTED: Meleagris gallopavo adenylosuccinate synthetase isozyme 2-like
7	PPP1R2	6.43324	0.0100986	Q2_Reed_16wkTurkeyMuscle_02_C16	XM_010716375.3	PREDICTED: Meleagris gallopavo protein phosphatase 1 regulatory inhibitor subunit 2
8	ARPP19	6.36138	0.00279272	Contig[2771]	XM_019619377.1	PREDICTED: Meleagris gallopavo cAMP regulated phosphoprotein 19
9	FTH1	6.24882	0.025419	Contig[ferritin__heavy_polypept	NM_205086.1	Gallus gallus ferritin, heavy polypeptide 1 (FTH1)
10	CTSL	6.06994	0.0290266	Contig[0493]	XM_010725820.3	PREDICTED: Meleagris gallopavo cathepsin L
11	HSP90AA1	5.92362	0.0418286	Q2_Reed_UM_Mg_cDNA1_06_11C02	XM_010711927.3	PREDICTED: Meleagris gallopavo heat shock protein 90 alpha family class A member 1
12	FN1	5.85471	0.00312906	Q3_Reed_UM_Mg_cDNA1_05_80H10	XM_019617349.1	PREDICTED: Meleagris gallopavo fibronectin 1
13	LOC100548808	5.66604	0.00206764	Q2_Reed_um_mg_cDNA1_02_32H04	XM_010715351.1	PREDICTED: Meleagris gallopavo ubiquitin carboxyl-terminal hydrolase 12-like
14	FTH1	5.65732	0.00171703	Contig[ferritin__heavy_polypept-C	NM_205086.1	Gallus gallus ferritin, heavy polypeptide 1 (FTH1)
15	TAX1BP1	5.38459	0.0351671	Q1_Reed_18d_tembryo_03_C21_323	XM_019616511.2	PREDICTED: Meleagris gallopavo Tax1 binding protein 1
16	MEF2A	5.38008	0.0290266	Q3_Reed_1DPH_cDNA_01_B19_290	XM_019619561.2	PREDICTED: Meleagris gallopavo myocyte enhancer factor 2A
17	S100A11	5.29491	0.00318273	Calgizarrin	NM_205166.2	Gallus gallus S100 calcium binding protein A11 (S100A11), mRNA
18	EIF3E	5.28943	0.0495128	Q2_Reed_18d_tembryo_07_I18_281	XM_010709216.2	PREDICTED: Meleagris gallopavo eukaryotic translation initiation factor 3 subunit E
19	PCOLCE2	5.09386	0.0334779	Contig[2858]	XM_031555067.1	PREDICTED: Meleagris gallopavo procollagen C-endopeptidase enhancer 2
20	SART3	4.81196	0.00259365	Contig[2536]	XM_010720244.3	PREDICTED: Meleagris gallopavo spliceosome associated factor 3, U4/U6 recycling protein
21	EIF5	4.50452	0.0339789	Contig[1067]	XM_010711943.3	PREDICTED: Meleagris gallopavo eukaryotic translation initiation factor 5
22	RAB1A	4.45127	0.0277874	Contig[2135]	XM_010706445.1	PREDICTED: Meleagris gallopavo RAB1A, member RAS oncogene family
23	PXMP4	4.41388	0.0404083	Q2_Reed_16wkturkeymuscle_08_G18	XM_010722296.2	PREDICTED: Meleagris gallopavo peroxisomal membrane protein 4
24	SDC2	4.32412	0.0144168	Syndecan-2-C	AY852249.1	Meleagris gallopavo syndecan-2 mRNA
25	HSP90B1	4.18447	0.0320118	Contig[0414]-distance-m	XM_003202376.4	PREDICTED: Meleagris gallopavo heat shock protein 90 beta family member 1
26	LOC100541517	4.17102	0.0365127	Q1_Reed_um_mg_cDNA1_04_44D06	XM_031554584.1	PREDICTED: Meleagris gallopavo protein FRA10AC1
27	EEF1G	4.14658	0.0321807	Contig[0503]	NM_001198750.1	Gallus gallus eukaryotic translation elongation factor 1 gamma (EEF1G), mRNA
28	ND5	4.00445	0.00528265	Contig[0630]	ADX43874.1	NADH dehydrogenase subunit 5
29	LOC100539142	3.9757	0.00318273	Q2_Reed_UM_Mg_cDNA1_05_58B08	XM_003206118.4	PREDICTED: Meleagris gallopavo dispanin subfamily A member 2b-like
30	SERP1	3.96697	0.00322935	Q1_Reed_18d_tembryo_02_C17_259	XM_031603746.1	PREDICTED: Phasianus colchicus stress associated endoplasmic reticulum protein 1 (SERP1), mRNA
31	SPTBN1	3.95795	0.0094918	Q1_Reed_UM_Mg_cDNA1_05_61E08	XM_010706345.3	PREDICTED: Meleagris gallopavo spectrin beta, non-erythrocytic 1
32	CCN1	3.94844	0.0092295	Q3_Reed_1DPH_cDNA_08_J09_138	XM_010715995.3	PREDICTED: Meleagris gallopavo cellular communication network factor 1
33	RPL23A	3.80581	0.0272904	Contig[Rpl23a_protein_(LOC41757-C	XM_415820.6	PREDICTED: Gallus gallus similar to Rpl23a protein (LOC417574)
34	SERP1	3.65857	0.0092295	Q1_Reed_18d_tembryo_02_C17_259-C	XM_031603746.1	PREDICTED: Phasianus colchicus stress associated endoplasmic reticulum protein 1 (SERP1), mRNA
35	MITF	3.64418	0.0176331	Q2_Reed_um_mg_cDNA1_02_30F04	XM_031555617.1	PREDICTED: Meleagris gallopavo melanocyte inducing transcription factor
36	ADAM17	3.64005	0.0328836	Q1_Reed_um_mg_cDNA1_04_90B12	XM_010707921.3	PREDICTED: Meleagris gallopavo ADAM metallopeptidase domain 17
37	GLRX5	3.56003	0.0433951	Contig[0616]	XM_003206710.4	PREDICTED: Meleagris gallopavo glutaredoxin 5
38	ETFDH	3.53497	0.00440423	Q3_Reed_UM_Mg_cDNA1_05_03C01	XM_010709442.2	PREDICTED: Meleagris gallopavo electron transfer flavoprotein dehydrogenase
39	SPRY3	3.43703	0.0425707	Q1_Reed_1DPH_cDNA_03_I01_009	XM_015278316.2	PREDICTED: Gallus gallus sprouty RTK signaling antagonist 3 (SPRY3), transcript variant X3, mRNA
40	CDC23	3.40327	0.0204593	Q1_Reed_1DPH_cDNA_05_E09_133	XM_010719276.3	PREDICTED: Meleagris gallopavo cell division cycle 23
41	NUP107	3.35155	0.0224197	Q1_Reed_16wkturkeymuscle_08_K05	XM_010707953.3	PREDICTED: Meleagris gallopavo nucleoporin 107
42	RTKN	3.32672	0.0394695	Q2_Reed_UM_Mg_cDNA1_06_21E03	XM_025150460.1	PREDICTED: Gallus gallus rhotekin (RTKN), transcript variant X11, mRNA
43	CKS2	3.18063	0.0328836	Q4_Reed_um_mg_cDNA1_02_20D03	XM_003213588.4	PREDICTED: Meleagris gallopavo CDC28 protein kinase regulatory subunit 2
44	ZC3H15	3.1454	0.00536885	Q3_Reed_16wkturkeymuscle_09_L23	XM_031554279.1	PREDICTED: Meleagris gallopavo zinc finger CCCH-type containing 15
45	PSMA7	3.12231	0.0316185	Contig[1586]	XM_010722499.2	PREDICTED: Meleagris gallopavo proteasome 20S subunit alpha 7
46	HDLBP	3.10335	0.0301779	Q2_Reed_UM_Mg_cDNA1_07_77E10	XM_010716510.2	PREDICTED: Meleagris gallopavo high density lipoprotein binding protein
47	28S RNA	3.09876	0.016266	Q4_Reed_16wkTurkeyMuscle_02_F10	XR_003078040.1	PREDICTED: Gallus gallus 28S ribosomal RNA (LOC112533599), rRNA
48	BIRC5	3.07216	0.0136376	Q2_Reed_um_mg_cDNA1_02_90B12	NM_001012319.1	Gallus gallus baculoviral IAP repeat containing 5 (BIRC5), transcript variant 2, mRNA
49	LOC100551038	3.05103	0.0288573	Q3_Reed_1DPH_cDNA_11_H23_360	XM_003202973.4	PREDICTED: Meleagris gallopavo cystathionine beta-synthase
50	LOC104915932	3.03648	0.0237682	Q1_Reed_1DPH_cDNA_07_M19_301	XM_010726893.2	PREDICTED: Meleagris gallopavo non-structural maintenance of chromosomes element 3 homolog
51	SSR3	3.03646	0.0316185	Q1_Reed_18d_tembryo_01_I09_137	XM_019619220.2	PREDICTED: Meleagris gallopavo signal sequence receptor subunit 3
52	SDE2	3.02583	0.0356821	Q4_Reed_16wkturkeymuscle_09_D18	XM_010706798.1	PREDICTED: Meleagris gallopavo SDE2 telomere maintenance homolog
53	LOC100546408	2.97424	0.016266	Q4_Reed_16wkturkeymuscle_06_H06	XM_019617414.2	PREDICTED: Meleagris gallopavo glycerol-3-phosphate dehydrogenase, mitochondrial
54	PRKAA1	2.85323	0.0161793	Q3_Reed_um_Mg_cDNA1_09_20D03	NM_001303217.1	Meleagris gallopavo protein kinase, AMP-activated, alpha 1 catalytic subunit
55	VASN	2.84913	0.0163964	Q3_Reed_16wkTurkeyMuscle_02_B11	XM_010719356.3	PREDICTED: Meleagris gallopavo vasorin
56	ARIH1	2.84878	0.03236	Q2_Reed_18d_tembryo_06_K12_187	XM_010717119.3	PREDICTED: Meleagris gallopavo ariadne RBR E3 ubiquitin protein ligase 1
57	MYF6	2.83408	0.027927	MYF6	NM_001030746.1	Gallus gallus myogenic factor 6 (herculin) (MYF6), mRNA.
58	LOC104911484	2.82658	0.0283148	Q4_Reed_1DPH_cDNA_02_J24_378	XR_793939.3	PREDICTED: Meleagris gallopavo uncharacterized LOC104911484
59	CEBPD	2.81577	0.0285104	Q1_Reed_1DPH_cDNA_04_O19_303	XM_031612939.1	PREDICTED: Phasianus colchicus CCAAT enhancer binding protein delta (CEBPD), mRNA
60	LOC104911816	2.72467	0.0201145	Q1_Reed_16wkturkeymuscle_08_A13	XM_019617271.2	PREDICTED: Meleagris gallopavo glycerol-3-phosphate dehydrogenase, mitochondrial-like
61	INSIG1	2.70745	0.0307959	Q1_Reed_18d_tembryo_07_M15_237	XM_010712335.3	PREDICTED: Meleagris gallopavo insulin induced gene 1
62	RPS15	2.67123	0.0233644	Q1_Reed_1DPH_02_03_I01_009	XM_010725012.3	PREDICTED: Meleagris gallopavo ribosomal protein S15
63	TMBIM6	2.65987	0.0418286	Contig[2522]	XM_025145468.1	PREDICTED: Gallus gallus transmembrane BAX inhibitor motif containing 6 (TMBIM6), transcript variant X2, mRNA
64	IP6K2	2.60962	0.0313988	Q2_Reed_um_Mg_cDNA1_09_60D08	XM_003210090.4	PREDICTED: Meleagris gallopavo inositol hexakisphosphate kinase 2
65	DCTN6	2.57026	0.0307959	Q1_Reed_1DPH_02_02_58B08	XM_010709615.3	PREDICTED: Meleagris gallopavo dynactin subunit 6
66	NFATC2	2.52622	0.016266	NFAT	XM_417509.5	PREDICTED: Gallus gallus similar to nuclear factor of activated T-cells, cytoplasmic, calcineurin-dependent 2 (LOC419346)
67	PSMF1	2.48903	0.0353594	Contig[0126]	XM_003212096.4	PREDICTED: Meleagris gallopavo proteasome inhibitor subunit 1
68	LRRC59	2.46877	0.0439182	Q4_Reed_UM_Mg_cDNA1_06_47G06	XM_010721692.3	PREDICTED: Meleagris gallopavo leucine rich repeat containing 59
69	LSM4	2.46758	0.0304998	Contig[0604]	XM_019610097.2	PREDICTED: Meleagris gallopavo LSM4 homolog, U6 small nuclear RNA and mRNA degradation associated
70	RPS3A	2.40468	0.0290266	Q3_Reed_um_Mg_cDNA_01_42B06	XM_003205439.4	PREDICTED: Meleagris gallopavo ribosomal protein S3A
71	NVL	2.40255	0.0416123	Q3_Reed_16wkTurkeyMuscle_02_D09	XM_010706670.3	PREDICTED: Meleagris gallopavo nuclear VCP like
72	SLC25A15	2.38601	0.0204593	Q1_Reed_um_Mg_cDNA1_08_06F01	XM_003203298.4	PREDICTED: Meleagris gallopavo solute carrier family 25 member 15
73	CDV3	2.36187	0.0481204	Contig[0793]	XM_010712938.3	PREDICTED: Meleagris gallopavo CDV3 homolog
74	LOC100551374	2.35356	0.0353594	Q1_Reed_16wkturkeyMuscle_02_I07	XM_003209143.4	PREDICTED: Meleagris gallopavo deoxyribodipyrimidine photo-lyase-like
75	IWS1	2.25752	0.045289	Contig[1069]	XM_003208952.3	PREDICTED: Meleagris gallopavo interacts with SUPT6H, CTD assembly factor 1
76	LOC104911327	2.25458	0.0415874	Q1_Reed_1DPH_cDNA_08_A19_289	XR_793827.3	PREDICTED: Meleagris gallopavo uncharacterized LOC104911327
77	RAD51	2.23329	0.0290266	Q2_Reed_UM_Mg_cDNA1_10_39G05	XM_019615307.1	PREDICTED: Meleagris gallopavo RAD51 recombinase
78	ZFAND1	2.23249	0.0269074	Q4_Reed_UM_Mg_cDNA1_05_72H09	XM_019614125.2	PREDICTED: Meleagris gallopavo zinc finger AN1-type containing 1
79	RPL19	2.22555	0.0304998	Contig[2561]	XM_010724597.3	PREDICTED: Meleagris gallopavo ribosomal protein L19
80	SDC2	2.20425	0.0462875	Syndecan-2-C	AY852249.1	Meleagris gallopavo syndecan-2 mRNA
81	HAGH	2.11729	0.0436116	Q4_Reed_16wkturkeymuscle_08_B02	XM_010719535.3	PREDICTED: Meleagris gallopavo hydroxyacylglutathione hydrolase
82	LOC100539974	2.10826	0.0462875	Q2_Reed_18d_tembryo_05_M06_093	XM_010726936.3	PREDICTED: Meleagris gallopavo tubulin alpha-1B chain
83	RPL38	2.09749	0.0394695	Q1_Reed_1DPH_cDNA_01_I19_297	XM_003211510.4	PREDICTED: Meleagris gallopavo ribosomal protein L38
84	EMG1	2.07803	0.03236	Q1_Reed_1DPH_cDNA_10_O07_111	XM_003202649.4	PREDICTED: Meleagris gallopavo EMG1 N1-specific pseudouridine methyltransferase
85	CHRDL2	2.06711	0.0319418	Q1_Reed_um_mg_cDNA1_04_41A06	XM_031606119.1	PREDICTED: Phasianus colchicus chordin like 2 (CHRDL2), mRNA
86	SELENOS	2.06194	0.0462875	Selenoprotein_SEL-S_	NM_001024734.3	Gallus gallus selenoprotein S (SELENOS), mRNA
87	ZBTB8OS	2.02511	0.0399198	Q2_Reed_1DPH_cDNA_06_I20_313	XM_019622709.2	PREDICTED: Meleagris gallopavo zinc finger and BTB domain containing 8 opposite strand
88	NME2	2.00798	0.0345827	Contig[non-metastatic_cells_2__-C	NM_205047.1	Gallus gallus non-metastatic cells 2, protein (NM23B) expressed in (NME2)
89	NDUFS7	2.00392	0.0482996	Q1_Reed_1DPH_cDNA_06_M13_205	XM_010725010.3	PREDICTED: Meleagris gallopavo NADH:ubiquinone oxidoreductase core subunit S7
90	RAB18	1.98864	0.0497392	Contig[2253]	XM_010712515.2	PREDICTED: Meleagris gallopavo RAB18, member RAS oncogene family
91	PXMP4	1.94026	0.0497392	Q1_Reed_1DPH_cDNA_04_K05_075	XM_010722296.2	PREDICTED: Meleagris gallopavo peroxisomal membrane protein 4
92	RCN1	0.534013	0.0483908	Contig[2791]	XM_010710737.2	PREDICTED: Meleagris gallopavo reticulocalbin 1
93	GPC1	0.51886	0.0462875	Glypican_precursor	AY150229.1	Meleagris gallopavo glypican precursor
94	TNNT3	0.51274	0.0433206	Q4_Reed_16wkTurkeyMuscle_01_N10	XM_031553329.1	PREDICTED: Meleagris gallopavo troponin T3, fast skeletal type
95	NDUFA9	0.505778	0.044365	Contig[0810]	XM_010716570.3	PREDICTED: Meleagris gallopavo NADH:ubiquinone oxidoreductase subunit A9
96	LOC109364634	0.496101	0.0406781	Contig[2707]	XM_019611266.2	PREDICTED: Meleagris gallopavo calponin-1-like
97	SFRP2	0.4948	0.0467056	Q2_Reed_UM_Mg_cDNA1_06_77E10	XM_010709426.3	PREDICTED: Meleagris gallopavo secreted frizzled related protein 2
98	LOC100549893	0.491215	0.0466832	Contig[0675]	XM_010718524.2	PREDICTED: Meleagris gallopavo cytochrome b-c1 complex subunit 1, mitochondrial
99	ZNF207	0.48198	0.0482996	Q2_Reed_18d_tembryo_06_M06_093	XM_031556345.1	PREDICTED: Meleagris gallopavo zinc finger protein 207
100	TNNT3	0.476211	0.0339789	Contig[0137]	XM_031553321.1	PREDICTED: Meleagris gallopavo troponin T3, fast skeletal type
101	RYR1	0.471486	0.0491266	alpha-RYR	EU177005.1	Meleagris gallopavo skeletal muscle ryanodine receptor isoform alpha (alpha-RYR) mRNA, complete cds, alternatively spliced
102	LOC100542258	0.470653	0.0397836	Q2_Reed_16wkturkeyMuscle_01_I04	XM_003214097.3	PREDICTED: Meleagris gallopavo TSC22 domain family protein 3-like
103	RAB7A	0.4663	0.0418286	Q3_Reed_18d_tembryo_01_N23_366	XM_025154624.1	PREDICTED: Gallus gallus RAB7A, member RAS oncogene family (RAB7A), transcript variant X2, mRNA
104	SUCO	0.454442	0.0351671	Contig[2765]	XM_019618566.2	PREDICTED: Meleagris gallopavo SUN domain containing ossification factor
105	HEYL	0.454221	0.0351671	Q1_Reed_18d_tembryo_06_A07_097	XM_031594736.1	PREDICTED: Phasianus colchicus hes related family bHLH transcription factor with YRPW motif like (HEYL), mRNA
106	SAR1A	0.452506	0.0456477	Q3_Reed_um_Mg_cDNA_01_79G10	XM_010714314.2	PREDICTED: Meleagris gallopavo secretion associated Ras related GTPase 1A
107	OBSCN	0.449167	0.0288573	Contig[0858]	XM_010712264.3	PREDICTED: Meleagris gallopavo obscurin, cytoskeletal calmodulin and titin-interacting RhoGEF
108	AKAP13	0.443846	0.03433	Q4_Reed_UM_Mg_cDNA1_06_62F08	XM_031555334.1	PREDICTED: Meleagris gallopavo A-kinase anchoring protein 13
109	HSF2	0.441996	0.0497392	Q3_Reed_1DPH_02_03_N11_174	XM_019613017.2	PREDICTED: Meleagris gallopavo heat shock transcription factor 2
110	TPST1	0.440987	0.0462875	Q2_Reed_um_mg_cDNA1_02_66B09	XM_010721737.3	PREDICTED: Meleagris gallopavo tyrosylprotein sulfotransferase 1
111	HIBCH	0.438124	0.0398171	Contig[2829]	XM_031554139.1	PREDICTED: Meleagris gallopavo 3-hydroxyisobutyryl-CoA hydrolase
112	LOC100543639	0.435899	0.0406781	Q3_Reed_1DPH_cDNA_12_H17_264	XR_795584.3	PREDICTED: Meleagris gallopavo uncharacterized LOC100543639
113	LOC100543527	0.42616	0.0497392	Contig[1929]	XM_031554765.1	PREDICTED: Meleagris gallopavo cytochrome c-type heme lyase
114	GSTA4	0.420714	0.0384196	Q3_Reed_1DPH_cDNA_02_F09_134	NM_001303158.1	Meleagris gallopavo glutathione S-transferase 3
115	TNNT3	0.420311	0.0300858	Q3_Reed_16wkturkeymuscle_07_B15	XM_003206281.2	PREDICTED: Meleagris gallopavo troponin T3, fast skeletal type
116	novel transcript	0.412117	0.0371357	Q3_Reed_um_mg_cDNA1_03_24H03		novel transcript
117	LOC100544502	0.408827	0.041354	Q4_Reed_um_Mg_cDNA1_09_12D02-C	XM_010715129.2	PREDICTED: Meleagris gallopavo nuclear cap-binding protein subunit 2
118	RNF128	0.406519	0.0208808	Contig[0165]	XM_021406523.1	PREDICTED: Numida meleagris ring finger protein 128, E3 ubiquitin protein ligase (RNF128), mRNA
119	VAV2	0.405784	0.0398171	Q3_Reed_1DPH_cDNA_11_P17_272	XM_010720981.1	PREDICTED: Meleagris gallopavo vav guanine nucleotide exchange factor 2
120	LOC100551399	0.405661	0.0351671	Q4_Reed_1DPH_cDNA_04_P20_320	XM_019618172.2	PREDICTED: Meleagris gallopavo importin subunit alpha-5
121	RAB24	0.404456	0.0346538	Q2_Reed_1DPH_cDNA_01_I22_345	XM_010719061.2	PREDICTED: Meleagris gallopavo RAB24, member RAS oncogene family
122	NCAM1	0.402466	0.0134245	Q1_Reed_18d_tembryo_02_A11_161	XM_031556850.1	PREDICTED: Meleagris gallopavo neural cell adhesion molecule 1
123	LSP1	0.384492	0.03236	Contig[1736]	XM_010711003.2	PREDICTED: Meleagris gallopavo lymphocyte specific protein 1
124	PFKM	0.383737	0.0179779	Contig[1215]	XM_019611610.1	PREDICTED: Meleagris gallopavo phosphofructokinase, muscle
125	ACTR1A	0.379988	0.0137783	Q2_Reed_18d_tembryo_07_G02_023	XM_010714639.3	PREDICTED: Meleagris gallopavo actin related protein 1A
126	LOC100546786	0.379345	0.0151556	Contig[0870]	XM_003202948.4	PREDICTED: Meleagris gallopavo SH3 domain-binding glutamic acid-rich-like protein
127	TNNT3	0.377304	0.010002	Contig[2281]	XM_010711008.1	PREDICTED: Meleagris gallopavo troponin T3, fast skeletal type
128	LOC104914682	0.375385	0.0429641	Contig[1681]	XM_019609952.1	PREDICTED: Meleagris gallopavo cilia- and flagella-associated protein 251-like
129	TNNI1	0.371976	0.016266	Contig[troponin_I_type_1_(skele-C	XM_419242	PREDICTED: Gallus gallus troponin I type 1 (skeletal, slow) (TNNI1)
130	CAMK2A	0.371043	0.0334779	Q1_Reed_16wkturkeymuscle_08_O05	XM_019620472.1	PREDICTED: Meleagris gallopavo calcium/calmodulin dependent protein kinase II alpha
131	SLC39A13	0.370421	0.0189455	Contig[0641]	XM_010711375.3	PREDICTED: Meleagris gallopavo solute carrier family 39 member 13
132	ATP2A3	0.365775	0.0352771	Q4_Reed_1DPH_cDNA_10_J20_314	XM_003211678.4	PREDICTED: Meleagris gallopavo ATPase sarcoplasmic/endoplasmic reticulum Ca2+ transporting 3
133	ANKRA2	0.362533	0.0115477	Q3_Reed_16wkTurkeyMuscle_03_D03	XM_010726642.2	PREDICTED: Meleagris gallopavo ankyrin repeat family A member 2
134	ELOVL5	0.360376	0.0353594	Q1_Reed_1DPH_cDNA_10_E11_165	XM_003204431.4	PREDICTED: Meleagris gallopavo ELOVL fatty acid elongase 5
135	LOC110392031	0.357085	0.0290266	Q1_Reed_1DPH_cDNA_05_E01_005	XM_021383972.1	PREDICTED: Numida meleagris ubiquinol-cytochrome-c reductase complex assembly factor 3 (LOC110392031), mRNA
136	TNNT3	0.355896	0.0482996	Q2_Reed_16wkturkeymuscle_10_I06	XM_010711008.1	PREDICTED: Meleagris gallopavo troponin T3, fast skeletal type
137	GNMT	0.351757	0.0483892	Contig[2727]	XM_010706618.1	PREDICTED: Meleagris gallopavo glycine N-methyltransferase
138	ANXA6	0.348201	0.00726526	Q2_Reed_UM_Mg_cDNA1_06_03C01	XM_010719149.3	PREDICTED: Meleagris gallopavo annexin A6
139	ITPK1	0.345505	0.0146812	Q4_Reed_UM_Mg_cDNA1_07_53E07	XM_031553656.1	PREDICTED: Meleagris gallopavo inositol-tetrakisphosphate 1-kinase
140	CKB	0.340314	0.0144964	Contig[1463]	XM_010711953.3	PREDICTED: Meleagris gallopavo creatine kinase B
141	TNNT3	0.337569	0.016266	Contig[1863]-C	XM_010711008.1	PREDICTED: Meleagris gallopavo troponin T3, fast skeletal type
142	MYLPF	0.337491	0.0136289	Q2_Reed_um_Mg_cDNA1_08_77E10	NM_001198744.1	Gallus gallus myosin light chain, phosphorylatable, fast skeletal muscle (MYLPF), mRNA
143	ATP2A2	0.335967	0.0151556	Q1_Reed_1DPH_cDNA_01_I05_073	XM_010720107.2	PREDICTED: Meleagris gallopavo ATPase sarcoplasmic/endoplasmic reticulum Ca2+ transporting 2
144	RAPSN	0.319835	0.00667446	Contig[0953]	XM_010711377.3	PREDICTED: Meleagris gallopavo receptor associated protein of the synapse
145	TNNC2	0.317196	0.0110672	Contig[1001]	XM_010722586.3	PREDICTED: Meleagris gallopavo troponin C2, fast skeletal type
146	KIF1B	0.314374	0.0208808	Contig[1571]	XM_031556637.1	PREDICTED: Meleagris gallopavo kinesin family member 1B
147	AKT1	0.310762	0.0172733	AKT1	NM_205055	Gallus gallus v-akt murine thymoma viral oncogene homolog 1 (AKT1), mRNA
148	GPX3	0.308675	0.0406781	Contig[0442]	NM_001308655.1	Meleagris gallopavo glutathione peroxidase 3
149	COL1A2	0.303738	0.00952067	Contig[2482]	XM_010712676.1	PREDICTED: Meleagris gallopavo collagen type I alpha 2 chain
150	CD81	0.300824	0.0201145	Contig[0465]	XM_010711036.3	PREDICTED: Meleagris gallopavo CD81 molecule
151	HACD1	0.300273	0.0215459	Contig[1086]	XM_010712619.3	PREDICTED: Meleagris gallopavo 3-hydroxyacyl-CoA dehydratase 1
152	SRRM4	0.295117	0.016266	Contig[0367]	XM_031556019.1	PREDICTED: Meleagris gallopavo serine/arginine repetitive matrix 4
153	GOLGA3	0.293435	0.00527202	Q2_Reed_16wkTurkeyMuscle_03_E04	XM_010719995.3	PREDICTED: Meleagris gallopavo golgin A3
154	repetitve element	0.292788	0.0367363	Q1_Reed_1DPH_02_03_G17_263		repetitve element
155	TTN	0.284433	0.0352771	Q2_Reed_16wkturkeymuscle_09_K12	XM_031554287.1	PREDICTED: Meleagris gallopavo titin
156	SDK2	0.283444	0.0160449	Q3_Reed_18d_tembryo_02_J09_138	XM_031599216.1	PREDICTED: Phasianus colchicus sidekick cell adhesion molecule 2 (SDK2), mRNA
157	FLN2	0.282427	0.0304998	Filamin_muscle_FLN2	NM_204573	Gallus gallus cgABP260 (LOC395260)
158	QKI	0.272966	0.0128784	Q2_Reed_1DPH_cDNA_02_K16_251	XM_031612805.1	PREDICTED: Phasianus colchicus QKI, KH domain containing RNA binding (QKI), transcript variant X8, mRNA
159	LARP4B	0.272362	0.00322935	Contig[2265]	XM_010712411.3	PREDICTED: Meleagris gallopavo La ribonucleoprotein 4B
160	ANTXRL	0.27227	0.0101683	Q1_Reed_um_mg_cDNA1_04_88H11	XM_003207995.4	PREDICTED: Meleagris gallopavo ANTXR like
161	ASIC4	0.26729	0.00528265	Q4_Reed_UM_Mg_cDNA1_10_92D12	XM_010713802.3	PREDICTED: Meleagris gallopavo acid sensing ion channel subunit family member 4
162	CSNK2B	0.264437	0.0428614	Contig[casein_kinase_II_beta_su	M59458	Chicken casein kinase II beta subunit mRNA
163	OLFML2A	0.25902	0.0047965	Contig[1494]	XM_031556251.1	PREDICTED: Meleagris gallopavo olfactomedin like 2A
164	FGF4	0.25752	0.00919902	FGF4	NM_001031546	Gallus gallus fibroblast growth factor 4 (heparin secretory transforming protein 1, Kaposi sarcoma oncogene) (FGF4)
165	RAC1	0.257481	0.0222941	Q3_Reed_um_mg_cDNA1_04_14F02	XM_021406417.1	PREDICTED: Numida meleagris p21 (RAC1) activated kinase 3 (PAK3), transcript variant X3, mRNA
166	LOC104915658	0.256902	0.0124746	Q3_Reed_18d_tembryo_02_L07_108	XR_796421.3	PREDICTED: Meleagris gallopavo uncharacterized LOC104915658
167	BIN1	0.250734	0.00482797	Q2_Reed_1DPH_cDNA_03_M14_221	XM_027462211.1	PREDICTED: Anas platyrhynchos bridging integrator 1 (BIN1), transcript variant X19, mRNA
168	CLDND1	0.246894	0.0162779	Q2_Reed_18d_tembryo_05_O20_319	XM_003202738.4	PREDICTED: Meleagris gallopavo claudin domain containing 1
169	SLN	0.24653	0.0166461	Contig[0727]	XM_010729028.2	PREDICTED: Meleagris gallopavo sarcolipin
170	POLDIP2	0.24553	0.00423332	Q1_Reed_1DPH_02_03_E07_101	XM_010721879.2	PREDICTED: Meleagris gallopavo DNA polymerase delta interacting protein 2
171	LOC100303673	0.2451	0.00868138	Q2_Reed_1DPH_cDNA_04_E24_373	NM_001303170.1	Meleagris gallopavo myogenin
172	LOC109368623	0.244796	0.0094314	Q1_Reed_UM_Mg_cDNA1_06_62F08	XM_019617291.1	PREDICTED: Meleagris gallopavo nebulin-like
173	TNNT3	0.244359	0.00446225	Q3_Reed_16wkTurkeyMuscle_04_L11	XM_010711027.1	PREDICTED: Meleagris gallopavo troponin T3, fast skeletal type
174	ZNF706	0.243639	0.0134129	Q1_Reed_1DPH_cDNA_03_E03_037	XM_010709181.3	PREDICTED: Meleagris gallopavo zinc finger protein 706
175	TPM4	0.243506	0.0290266	Contig[cardiac_tropomyosin-like	X54281.1	C.coturnix japonica gene for cardiac and cytoskeletal tropomyosin, exons 9-11
176	LOC104909939	0.241379	0.00292694	Q4_Reed_16wkturkeymuscle_08_N06	XM_010707793.2	PREDICTED: Meleagris gallopavo M-protein, striated muscle-like
177	LDB3	0.233465	0.0300858	Contig[0697]	XM_019617470.1	PREDICTED: Meleagris gallopavo LIM domain binding 3
178	TGFB3	0.233447	0.0115477	Contig[1623]	XM_010711764.3	PREDICTED: Meleagris gallopavo transforming growth factor beta 3
179	BMP7	0.232325	0.00536885	Q3_Reed_um_mg_cDNA1_02_85E11	XM_019622301.2	PREDICTED: Meleagris gallopavo bone morphogenetic protein 7
180	COL3A1	0.23036	0.00485761	Contig[0946]	XM_010713346.3	PREDICTED: Meleagris gallopavo collagen type III alpha 1 chain
181	TNNT3	0.227938	0.0226571	Q3_Reed_1DPH_cDNA_04_F21_326	XM_031553353.1	PREDICTED: Meleagris gallopavo troponin T3, fast skeletal type
182	MAP2K3	0.226455	0.0174612	Contig[0846]	XM_010719602.3	PREDICTED: Meleagris gallopavo mitogen-activated protein kinase kinase 3
183	AGRN	0.224854	0.00667446	Q3_Reed_um_Mg_cDNA1_09_76D10	XM_010722770.3	PREDICTED: Meleagris gallopavo agrin
184	KPNA4	0.224101	0.00868138	Q1_Reed_um_Mg_cDNA1_09_91C12	XM_010716979.3	PREDICTED: Meleagris gallopavo karyopherin subunit alpha 4
185	CSRP3	0.217298	0.0288573	Q3_Reed_1DPH_cDNA_12_B19_290	XM_010710734.3	PREDICTED: Meleagris gallopavo cysteine and glycine rich protein 3
186	PFKM	0.20681	0.0084959	Q4_Reed_16wkTurkeyMuscle_02_L08	XM_019611610.1	PREDICTED: Meleagris gallopavo phosphofructokinase, muscle
187	LOC104911671	0.204106	0.00351752	Q4_Reed_UM_Mg_cDNA1_07_52D07	XM_010713593.3	PREDICTED: Meleagris gallopavo myc box-dependent-interacting protein 1-like
188	ITGB1	0.202356	0.00440423	Integrin_Beta-1D	AF547620.1	Gallus gallus integrin beta1D mRNA
189	ACTA1	0.201018	0.0200442	Contig[0024]	XM_010707017.3	PREDICTED: Meleagris gallopavo actin alpha 1, skeletal muscle
190	PKM	0.196821	0.00259413	Q3_Reed_UM_Mg_cDNA1_06_19C03	LOC100541568	pyruvate kinase M1/2 [ Meleagris gallopavo (turkey) ]
191	LOC116217087	0.19043	0.00318273	Q4_Reed_18d_tembryo_06_D20_308	XM_031555288.1	PREDICTED: Meleagris gallopavo tropomyosin alpha-1 chain-like
192	SLC25A4	0.190207	0.00308332	Q4_Reed_16wkTurkeyMuscle_03_F12	XM_003205518.3	PREDICTED: Meleagris gallopavo solute carrier family 25 member 4
193	LOC104914006	0.188565	0.0300858	Q3_Reed_UM_Mg_cDNA1_07_10B02	XM_010722333.3	PREDICTED: Meleagris gallopavo receptor-type tyrosine-protein phosphatase T-like
194	TNNI1	0.184856	0.00312906	Contig[1702]	XM_031556945.1	PREDICTED: Meleagris gallopavo troponin I1, slow skeletal type
195	RGCC	0.183081	0.00533013	Q2_Reed_1DPH_cDNA_05_C12_179	XM_019618203.1	PREDICTED: Meleagris gallopavo regulator of cell cycle
196	LOC100545462	0.180385	0.00148056	Contig[1532]	XM_010709814.3	PREDICTED: Meleagris gallopavo tubulin alpha-3 chain
197	SRL	0.174003	0.0281318	Q1_Reed_1DPH_cDNA_07_M01_013	XM_010719364.3	PREDICTED: Meleagris gallopavo sarcalumenin
198	KLC4	0.173995	0.00446225	Q2_Reed_1DPH_02_01_15G02	XM_010706418.3	PREDICTED: Meleagris gallopavo kinesin light chain 4
199	OBSCN	0.173437	0.0021459	Q3_Reed_16wkturkeymuscle_09_L05	XM_025148275.1	PREDICTED: Gallus gallus obscurin, cytoskeletal calmodulin and titin-interacting RhoGEF (OBSCN), transcript variant X27, mRNA
200	CHRNG	0.169718	0.0027192	Q2_Reed_um_mg_cDNA1_04_37E05	XM_019619081.2	PREDICTED: Meleagris gallopavo cholinergic receptor nicotinic gamma subunit
201	RAPSN	0.169322	0.00257717	Q2_Reed_um_Mg_cDNA_01_57A08	XM_010711377.3	PREDICTED: Meleagris gallopavo receptor associated protein of the synapse
202	AKAP6	0.168077	0.0277874	Protein_Kinase_A_PRKA_	NM_004274	Homo sapiens A kinase (PRKA) anchor protein 6 (AKAP6)
203	LOC100541022	0.166456	0.00529366	Contig[2857]	XM_003213101.4	PREDICTED: Meleagris gallopavo keratin, type I cytoskeletal 19-like
204	RYR3	0.165838	0.00190469	beta-RYR	LOC100189600	Meleagris gallopavo skeletal muscle ryanodine receptor isoform beta (beta-RYR) mRNA, complete cds
205	CAV3	0.163872	0.00283943	Q3_Reed_16wkturkeymuscle_06_J11	XM_003210208.4	PREDICTED: Meleagris gallopavo caveolin 3
206	LOC100541535	0.158737	0.00440423	Q3_Reed_um_mg_cDNA1_04_84D11	XM_019610353.1	PREDICTED: Meleagris gallopavo ankycorbin
207	MYOZ1	0.157468	0.00206764	Contig[0887]	XM_010714390.2	PREDICTED: Meleagris gallopavo myozenin 1
208	CSRP3	0.154847	0.0207016	Contig[cardiac_LIM_protein_(CSR	NM_001199486	Gallus gallus cysteine and glycine-rich protein 3 (cardiac LIM protein) (CSRP3)
209	ACTN2	0.151305	0.00259413	Contig[0022]	XM_003204009.2	PREDICTED: Meleagris gallopavo actinin alpha 2
210	novel transcript	0.149313	0.00872093	Q1_Reed_um_Mg_cDNA1_08_88H11		novel transcript
211	LOC100540000	0.14786	0.0047965	Contig[0077]	XM_010725278.1	PREDICTED: Meleagris gallopavo tropomyosin beta chain
212	SRL	0.143922	0.0094314	Q1_Reed_1DPH_cDNA_02_G17_263	XM_010719364.3	PREDICTED: Meleagris gallopavo sarcalumenin
213	SLC25A3	0.143744	0.00485761	Q3_Reed_18d_tembryo_07_D11_164	XM_019611325.1	PREDICTED: Meleagris gallopavo solute carrier family 25 member 3
214	C8H10orf71	0.139458	0.00165039	Q1_Reed_16wkturkeyMuscle_03_M05	XM_031554438.1	PREDICTED: Meleagris gallopavo chromosome 8 C10orf71 homolog
215	RAPSN	0.138566	0.00137167	Contig[1459]	XM_010711377.3	PREDICTED: Meleagris gallopavo receptor associated protein of the synapse
216	HACD1	0.137133	0.00312906	Q1_Reed_18d_tembryo_01_A21_321	XM_010712619.3	PREDICTED: Meleagris gallopavo 3-hydroxyacyl-CoA dehydratase 1
217	EEF1A2	0.132864	0.00259413	Contig[eukaryotic_translation_e1	NM_001032398	Gallus gallus eukaryotic translation elongation factor 1 alpha 2 (EEF1A2)
218	VASH2	0.132791	0.00137167	Q3_Reed_um_mg_cDNA1_03_54F07	XM_010706713.3	PREDICTED: Meleagris gallopavo vasohibin 2
219	CKB	0.130945	0.0021459	Contig[1113]-C	XM_010711953.3	PREDICTED: Meleagris gallopavo creatine kinase B
220	COL3A1	0.130343	0.0174612	Contig[0711]	XM_010713346.3	PREDICTED: Meleagris gallopavo collagen type III alpha 1 chain
221	PFKM	0.127508	0.00315481	Contig[1139]	XM_019611610.1	PREDICTED: Meleagris gallopavo phosphofructokinase, muscle
222	MYL3	0.125955	0.00513805	Contig[cardiac_myosin_alkali_li	X13863.1	Chicken cardiac myosin alkali light chain gene exon 1
223	ACTN2	0.125265	0.00312906	Contig[0038]	XM_003204009.2	PREDICTED: Meleagris gallopavo actinin alpha 2
224	HJV	0.125258	0.0174612	Q4_Reed_18d_tembryo_03_B18_274	XM_010727337.3	PREDICTED: Meleagris gallopavo hemojuvelin BMP co-receptor
225	SARDH	0.122056	0.00133213	Q3_Reed_1DPH_cDNA_05_H23_360	XM_010720979.3	PREDICTED: Meleagris gallopavo sarcosine dehydrogenase
226	TNNT3	0.121056	0.00125802	Q2_Reed_18d_tembryo_02_M08_125	XM_031553347.1	PREDICTED: Meleagris gallopavo troponin T3, fast skeletal type
227	SYNPO2L	0.11941	0.0457776	Q3_Reed_16wkTurkeyMuscle_02_L15	XM_003207976.3	PREDICTED: Meleagris gallopavo synaptopodin 2 like
228	LOC100545462	0.11648	0.00137167	Contig[1017]	XM_010709814.3	PREDICTED: Meleagris gallopavo tubulin alpha-3 chain
229	SYNPO2L	0.111444	0.00322935	Q1_Reed_1DPH_cDNA_09_I03_041	XM_003207976.3	PREDICTED: Meleagris gallopavo synaptopodin 2 like
230	CKB	0.108602	0.00550437	Contig[1113]	XM_010711953.3	PREDICTED: Meleagris gallopavo creatine kinase B
231	TMEM182	0.108173	0.0119331	Contig[2826]	XM_019623251.2	PREDICTED: Meleagris gallopavo transmembrane protein 182
232	SHISA2	0.108025	0.0253082	Contig[2789]	XM_010728973.2	PREDICTED: Meleagris gallopavo shisa family member 2
233	LOC100545462	0.107879	0.00529366	Contig[2640]	XM_010709814.3	PREDICTED: Meleagris gallopavo tubulin alpha-3 chain
234	undescribed transcript	0.106345	0.0283148	Q3_Reed_1DPH_cDNA_01_D21_324		undescribed transcript, chromosome Un
235	TRIM55	0.103252	0.00440423	Q3_Reed_18d_tembryo_01_H03_040	XM_010709002.3	PREDICTED: Meleagris gallopavo tripartite motif containing 55
236	LOC104911367	0.0974387	0.000928186	Q3_Reed_um_mg_cDNA1_02_65A09	XM_010712472.1	PREDICTED: Meleagris gallopavo supervillin-like
237	PDLIM3	0.0932211	0.0021459	Contig[0200]	XM_010710059.3	PREDICTED: Meleagris gallopavo PDZ and LIM domain 3
238	ACTN2	0.0921054	0.0094918	Q3_Reed_UM_Mg_cDNA1_05_36D05	XM_003204009.2	PREDICTED: Meleagris gallopavo actinin alpha 2
239	OBSCN	0.08865	0.00125802	Q4_Reed_UM_Mg_cDNA1_06_15G02	XM_021389269.1	PREDICTED: Numida meleagris obscurin, cytoskeletal calmodulin and titin-interacting RhoGEF (OBSCN), transcript variant X10, mRNA
240	ACTA1	0.0874542	0.000928186	Contig[alpha_actin__complete_CD	NM_001031063	Gallus gallus actin, alpha 1, skeletal muscle (ACTA1)
241	NCAM1	0.0813182	0.00139732	Q3_Reed_um_mg_cDNA1_02_94F12	XM_015298048.2	PREDICTED: Gallus gallus neural cell adhesion molecule 1 (NCAM1), transcript variant X18, mRNA
242	APOA1	0.080845	0.0021459	Contig[0902]	XM_010723719.3	PREDICTED: Meleagris gallopavo apolipoprotein A1
243	TNNI1	0.0741147	0.00139732	Contig[troponin_I_type_1_(skele	XM_419242.5	PREDICTED: Gallus gallus troponin I type 1 (skeletal, slow) (TNNI1)
244	LOC100303693	0.0731107	0.00259365	Contig[0417]-C	XM_010711583.2	PREDICTED: Meleagris gallopavo actin, alpha cardiac muscle 1
245	LOC116217087	0.0716192	0.00247521	Q4_Reed_18d_tembryo_06_D20_308-C	XM_031555288.1	PREDICTED: Meleagris gallopavo tropomyosin alpha-1 chain-like
246	repetitive element	0.0667468	0.00150405	Q4_Reed_um_Mg_cDNA1_08_71G09		repetitive element
247	LOC116217087	0.0663725	0.00137167	Q3_Reed_1DPH_cDNA_11_B03_034	XM_031555288.1	PREDICTED: Meleagris gallopavo tropomyosin alpha-1 chain-like
248	TNNC2	0.0663297	0.00259413	Contig[1001]-C	XM_010722586.3	PREDICTED: Meleagris gallopavo troponin C2, fast skeletal type
249	PDLIM3	0.0659516	0.0021459	Q2_Reed_16wkturkeymuscle_06_M04	XM_010710061.3	PREDICTED: Meleagris gallopavo PDZ and LIM domain 3
250	CAMK2A	0.0640616	0.00139732	Contig[2734]	XM_019620472.1	PREDICTED: Meleagris gallopavo calcium/calmodulin dependent protein kinase II alpha
251	ACTC1	0.0612192	0.0273039	Contig[alpha-cardiac_actin__com	XM_010711583.2	PREDICTED: Meleagris gallopavo alpha cardiac actin (LOC100303693)
252	TNNT3	0.0594228	0.00563397	Contig[0600]	XM_010711029.1	PREDICTED: Meleagris gallopavo troponin T3, fast skeletal type
253	TNNT2	0.0580562	0.00125802	Contig[cardiac_troponin_T_isofo	M10013.1	Chicken cardiac troponin T form I mRNA, complete cds
254	TNNT2	0.0557536	0.0029801	Contig[0574]	XM_010724037.3	PREDICTED: Meleagris gallopavo troponin T2, cardiac type
255	TNNT3	0.0553665	0.00308332	Contig[0034]	XM_010711008.1	PREDICTED: Meleagris gallopavo troponin T3, fast skeletal type
256	LOC100303693	0.0546467	0.0094918	Contig[0417]	XM_010711583.2	PREDICTED: Meleagris gallopavo actin, alpha cardiac muscle 1
257	TNNC2	0.0532294	0.00322935	Contig[0046]	XM_010722586.3	PREDICTED: Meleagris gallopavo troponin C2, fast skeletal type
258	ACTA1	0.0515592	0.00563397	Contig[alpha_actin__complete_CD-C	V01507.1	Gallus gallus gene coding for a-actin
259	HSP25	0.0504424	0.0094918	HSP25	NM_001010842	Gallus gallus heat shock protein 25 (HSP25)
260	ANKRD1	0.0498304	0.00260357	Q1_Reed_16wkturkeyMuscle_02_E23	XM_010714539.3	PREDICTED: Meleagris gallopavo ankyrin repeat domain 1
261	MYL12A	0.037206	0.0021459	Contig[myosin_L2B_regulatory_li	NM_205341.3	Gallus gallus myosin, light chain 12A, regulatory, non-sarcomeric (MYL12A)
262	novel transcript	0.0364166	0.00142575	Q3_Reed_16wkTurkeyMuscle_02_P15		novel transcript
263	CACNG1	0.0359553	0.000757625	Contig[1345]	XM_003211546.3	PREDICTED: Meleagris gallopavo calcium voltage-gated channel auxiliary subunit gamma 1
264	LOC104913742	0.0293672	0.0110095	Contig[2701]	XM_019621593.2	PREDICTED: Meleagris gallopavo myosin-1B-like
265	LOC104917029	0.0285235	0.0029801	Q1_Reed_um_Mg_cDNA1_08_83C11	XM_010728098.3	PREDICTED: Meleagris gallopavo troponin T, slow skeletal muscle-like
266	repetitive element	0.0268881	0.00120226	Q4_Reed_16wkturkeymuscle_10_B02		repetitive element
267	LOC100546786	0.026196	0.000338612	Contig[1574]	XM_003202948.4	PREDICTED: Meleagris gallopavo SH3 domain-binding glutamic acid-rich-like protein
268	HSPB2	0.0245292	0.000569348	Q4_Reed_um_Mg_cDNA1_08_62F08	XM_010723775.2	PREDICTED: Meleagris gallopavo heat shock protein family B (small) member 2
269	MYL1	0.016776	0.000338612	Contig[0120]	XM_010713312.3	PREDICTED: Meleagris gallopavo myosin light chain 1
270	MYL1	0.00696744	0.000561141	Contig[0130]	XM_010713312.3	PREDICTED: Meleagris gallopavo myosin light chain 1
